# Supplementary material
Source: publisher figshare collection journal article supplement (https://tandf.figshare.com/ndownloader/files/7738492)
Supplement: Supplementary file 1 [file 7738492]

**Supplemental data**

Table s1 Data of the five test cases recorded by pressure sensor P4

| *t* (s) | Pressure loads (kPa) | | | | |
| --- | --- | --- | --- | --- | --- |
| *hu* = 0.30 m *hd*= 0.30 m | | | | |
| *h* = 0.10 m | *h* = 0.20 m | *h* = 0.30 m | *h* = 0.40 m | *h* = 0.50 m |
| 3.05 | 2.58 | 2.89 | 2.79 | 2.87 | 2.77 |
| 3.06 | 2.92 | 2.75 | 2.89 | 3.05 | 3.09 |
| 3.07 | 2.87 | 3.19 | 2.98 | 3.12 | 2.88 |
| 3.08 | 2.59 | 3.10 | 2.80 | 2.92 | 2.59 |
| 3.09 | 2.70 | 2.72 | 2.70 | 2.92 | 2.80 |
| 3.10 | 2.91 | 2.89 | 2.93 | 3.07 | 3.05 |
| 3.11 | 2.73 | 3.15 | 3.02 | 3.01 | 2.81 |
| 3.12 | 2.61 | 3.05 | 2.76 | 2.93 | 2.60 |
| 3.13 | 2.80 | 2.95 | 2.72 | 3.07 | 2.87 |
| 3.14 | 2.86 | 2.92 | 2.96 | 3.07 | 3.05 |
| 3.15 | 2.69 | 2.92 | 2.95 | 2.86 | 2.77 |
| 3.16 | 2.70 | 3.05 | 2.73 | 2.93 | 2.66 |
| 3.17 | 2.80 | 3.05 | 2.78 | 3.16 | 2.88 |
| 3.18 | 2.71 | 2.89 | 3.00 | 3.03 | 2.87 |
| 3.19 | 2.70 | 2.96 | 2.94 | 2.84 | 2.71 |
| 3.20 | 2.86 | 3.09 | 2.70 | 2.99 | 2.86 |
| 3.21 | 2.83 | 2.94 | 2.75 | 3.13 | 3.03 |
| 3.22 | 2.66 | 2.88 | 3.00 | 2.98 | 2.78 |
| 3.23 | 2.65 | 3.09 | 2.94 | 2.89 | 2.53 |
| 3.24 | 2.76 | 3.08 | 2.72 | 3.02 | 2.84 |
| 3.25 | 2.83 | 2.85 | 2.79 | 3.09 | 3.19 |
| 3.26 | 2.81 | 2.89 | 2.95 | 2.96 | 2.86 |
| 3.27 | 2.71 | 3.11 | 2.86 | 2.92 | 2.47 |
| 3.28 | 2.67 | 3.01 | 2.78 | 3.07 | 2.77 |
| 3.29 | 2.76 | 2.86 | 2.90 | 3.09 | 3.07 |
| 3.30 | 2.81 | 3.05 | 2.90 | 2.86 | 2.84 |
| 3.31 | 2.74 | 3.12 | 2.74 | 2.89 | 2.70 |
| 3.32 | 2.71 | 2.83 | 2.81 | 3.18 | 2.86 |
| 3.33 | 2.76 | 2.84 | 2.99 | 3.08 | 2.91 |
| 3.34 | 2.79 | 3.16 | 2.88 | 2.79 | 2.77 |
| 3.35 | 2.74 | 3.09 | 2.68 | 2.96 | 2.73 |
| 3.36 | 2.66 | 2.82 | 2.83 | 3.20 | 2.86 |
| 3.37 | 2.72 | 2.92 | 3.03 | 2.98 | 2.93 |
| 3.38 | 2.87 | 3.11 | 2.85 | 2.81 | 2.80 |
| 3.39 | 2.81 | 2.99 | 2.67 | 3.05 | 2.72 |
| 3.40 | 2.63 | 2.87 | 2.87 | 3.14 | 2.82 |
| 3.41 | 2.68 | 3.03 | 2.98 | 2.92 | 2.90 |
| 3.42 | 2.85 | 3.14 | 2.84 | 2.90 | 2.84 |
| *t* (s) | Pressure loads (kPa) | | | | |
| *hu* = 0.30 m *hd*= 0.30 m | | | | |
| *h* = 0.10 m | *h* = 0.20 m | *h* = 0.30 m | *h* = 0.40 m | *h* = 0.50 m |
| 3.43 | 2.80 | 2.89 | 2.80 | 3.09 | 2.76 |
| 3.44 | 2.68 | 2.77 | 2.86 | 3.03 | 2.83 |
| 3.45 | 2.72 | 3.12 | 2.82 | 2.91 | 2.91 |
| 3.46 | 2.78 | 3.20 | 2.84 | 3.05 | 2.80 |
| 3.47 | 2.75 | 2.78 | 2.92 | 3.07 | 2.72 |
| 3.48 | 2.73 | 2.81 | 2.81 | 2.87 | 2.86 |
| 3.49 | 2.75 | 3.22 | 2.76 | 2.92 | 2.93 |
| 3.50 | 2.76 | 3.06 | 2.93 | 3.16 | 2.76 |
| 3.51 | 2.76 | 2.73 | 2.92 | 3.05 | 2.72 |
| 3.52 | 2.73 | 2.98 | 2.73 | 2.82 | 2.88 |
| 3.53 | 2.71 | 3.22 | 2.82 | 2.96 | 2.92 |
| 3.54 | 2.77 | 2.93 | 2.98 | 3.15 | 2.80 |
| 3.55 | 2.81 | 2.77 | 2.84 | 3.01 | 2.79 |
| 3.56 | 2.73 | 3.05 | 2.71 | 2.88 | 2.81 |
| 3.57 | 2.73 | 3.16 | 2.87 | 3.02 | 2.83 |
| 3.58 | 2.78 | 2.90 | 2.95 | 3.07 | 2.87 |
| 3.59 | 2.70 | 2.82 | 2.82 | 2.94 | 2.81 |
| 3.60 | 2.66 | 3.11 | 2.77 | 2.94 | 2.71 |
| 3.61 | 2.83 | 3.13 | 2.87 | 3.07 | 2.84 |
| 3.62 | 2.87 | 2.82 | 2.88 | 3.02 | 2.97 |
| 3.63 | 2.66 | 2.83 | 2.81 | 2.91 | 2.81 |
| 3.64 | 2.61 | 3.18 | 2.87 | 3.00 | 2.71 |
| 3.65 | 2.83 | 3.12 | 2.91 | 3.10 | 2.84 |
| 3.66 | 2.89 | 2.75 | 2.78 | 2.97 | 2.89 |
| 3.67 | 2.68 | 2.86 | 2.72 | 2.89 | 2.82 |
| 3.68 | 2.63 | 3.22 | 2.91 | 3.04 | 2.80 |
| 3.69 | 2.81 | 3.06 | 3.01 | 3.08 | 2.81 |
| 3.70 | 2.81 | 2.73 | 2.79 | 2.91 | 2.79 |
| 3.71 | 2.63 | 2.94 | 2.67 | 2.90 | 2.83 |
| 3.72 | 2.70 | 3.23 | 2.89 | 3.09 | 2.86 |
| 3.73 | 2.91 | 2.96 | 3.01 | 3.09 | 2.83 |
| 3.74 | 2.82 | 2.74 | 2.80 | 2.87 | 2.82 |
| 3.75 | 2.56 | 3.06 | 2.70 | 2.90 | 2.83 |
| 3.76 | 2.67 | 3.19 | 2.87 | 3.15 | 2.81 |
| 3.77 | 2.92 | 2.83 | 2.93 | 3.12 | 2.78 |
| 3.78 | 2.79 | 2.83 | 2.83 | 2.86 | 2.81 |
| 3.79 | 2.58 | 3.17 | 2.80 | 2.87 | 2.91 |
| 3.80 | 2.78 | 3.05 | 2.83 | 3.09 | 2.85 |
| 3.81 | 2.91 | 2.78 | 2.84 | 3.09 | 2.70 |
| 3.82 | 2.64 | 3.01 | 2.87 | 2.94 | 2.76 |
|  |  |  |  |  |  |
| *t* (s) | Pressure loads (kPa) | | | | |
| *hu* = 0.30 m *hd*= 0.30 m | | | | |
| *h* = 0.10 m | *h* = 0.20 m | *h* = 0.30 m | *h* = 0.40 m | *h* = 0.50 m |
| 3.83 | 2.58 | 3.14 | 2.86 | 2.92 | 2.93 |
| 3.84 | 2.91 | 2.88 | 2.80 | 3.00 | 2.90 |
| 3.85 | 2.89 | 2.87 | 2.80 | 3.05 | 2.77 |
| 3.86 | 2.56 | 3.13 | 2.88 | 3.01 | 2.78 |
| 3.87 | 2.64 | 3.07 | 2.91 | 2.93 | 2.86 |
| 3.88 | 2.91 | 2.82 | 2.84 | 2.96 | 2.82 |
| 3.89 | 2.80 | 2.89 | 2.79 | 3.06 | 2.81 |
| 3.90 | 2.61 | 3.12 | 2.80 | 3.02 | 2.86 |
| 3.91 | 2.76 | 3.07 | 2.87 | 2.96 | 2.79 |
| 3.92 | 2.85 | 2.85 | 2.94 | 3.00 | 2.74 |
| 3.93 | 2.67 | 2.90 | 2.85 | 2.99 | 2.87 |
| 3.94 | 2.68 | 3.12 | 2.71 | 2.95 | 2.91 |
| 3.95 | 2.87 | 3.06 | 2.80 | 3.05 | 2.77 |
| 3.96 | 2.78 | 2.84 | 2.96 | 3.08 | 2.74 |
| 3.97 | 2.60 | 2.92 | 2.86 | 2.90 | 2.90 |
| 3.98 | 2.73 | 3.10 | 2.72 | 2.88 | 2.92 |
| 3.99 | 2.90 | 3.03 | 2.84 | 3.13 | 2.73 |
| 4.00 | 2.73 | 2.91 | 2.95 | 3.13 | 2.71 |
| 4.01 | 2.59 | 2.96 | 2.85 | 2.86 | 2.91 |
| 4.02 | 2.80 | 3.00 | 2.74 | 2.85 | 2.92 |
| 4.03 | 2.91 | 2.97 | 2.81 | 3.12 | 2.75 |
| 4.04 | 2.67 | 2.99 | 2.92 | 3.12 | 2.76 |
| 4.05 | 2.59 | 3.00 | 2.90 | 2.88 | 2.88 |
| 4.06 | 2.84 | 2.94 | 2.80 | 2.89 | 2.86 |
| 4.07 | 2.87 | 2.95 | 2.78 | 3.09 | 2.77 |
| 4.08 | 2.66 | 3.04 | 2.83 | 3.06 | 2.80 |
| 4.09 | 2.65 | 2.99 | 2.86 | 2.89 | 2.87 |
| 4.10 | 2.82 | 2.92 | 2.89 | 2.96 | 2.85 |
| 4.11 | 2.81 | 3.02 | 2.88 | 3.09 | 2.78 |
| 4.12 | 2.69 | 3.02 | 2.78 | 2.99 | 2.77 |
| 4.13 | 2.70 | 2.89 | 2.74 | 2.90 | 2.83 |
| 4.14 | 2.78 | 2.98 | 2.90 | 3.06 | 2.90 |
| 4.15 | 2.78 | 3.09 | 2.98 | 3.08 | 2.84 |
| 4.16 | 2.72 | 2.91 | 2.79 | 2.88 | 2.74 |
| 4.17 | 2.72 | 2.88 | 2.70 | 2.93 | 2.82 |
| 4.18 | 2.76 | 3.10 | 2.87 | 3.17 | 2.89 |
| 4.19 | 2.77 | 3.03 | 2.96 | 3.06 | 2.81 |
| 4.20 | 2.75 | 2.81 | 2.84 | 2.82 | 2.78 |
| 4.21 | 2.70 | 2.96 | 2.76 | 2.92 | 2.85 |
| 4.22 | 2.71 | 3.16 | 2.81 | 3.13 | 2.84 |
|  |  |  |  |  |  |
| *t* (s) | Pressure loads (kPa) | | | | |
| *hu* = 0.30 m *hd*= 0.30 m | | | | |
| *h* = 0.10 m | *h* = 0.20 m | *h* = 0.30 m | *h* = 0.40 m | *h* = 0.50 m |
| 4.23 | 2.79 | 3.00 | 2.87 | 3.06 | 2.78 |
| 4.24 | 2.79 | 2.83 | 2.89 | 2.93 | 2.84 |
| 4.25 | 2.70 | 2.98 | 2.86 | 2.94 | 2.87 |
| 4.26 | 2.70 | 3.07 | 2.80 | 2.98 | 2.78 |
| 4.27 | 2.79 | 2.92 | 2.80 | 3.02 | 2.78 |
| 4.28 | 2.78 | 2.89 | 2.87 | 3.05 | 2.88 |
| 4.29 | 2.69 | 3.08 | 2.90 | 2.97 | 2.87 |
| 4.30 | 2.72 | 3.07 | 2.82 | 2.94 | 2.79 |
| 4.31 | 2.79 | 2.86 | 2.75 | 3.04 | 2.80 |
| 4.32 | 2.74 | 2.91 | 2.86 | 3.04 | 2.84 |
| 4.33 | 2.70 | 3.09 | 2.95 | 2.95 | 2.85 |
| 4.34 | 2.76 | 2.99 | 2.82 | 2.97 | 2.82 |
| 4.35 | 2.78 | 2.87 | 2.74 | 3.01 | 2.82 |
| 4.36 | 2.70 | 3.01 | 2.88 | 2.98 | 2.89 |
| 4.37 | 2.69 | 3.05 | 2.91 | 3.03 | 2.93 |
| 4.38 | 2.80 | 2.88 | 2.78 | 3.05 | 2.83 |
| 4.39 | 2.81 | 2.95 | 2.81 | 2.94 | 2.78 |
| 4.40 | 2.67 | 3.11 | 2.91 | 2.92 | 2.91 |
| 4.41 | 2.67 | 2.97 | 2.84 | 3.06 | 2.99 |
| 4.42 | 2.84 | 2.85 | 2.79 | 3.09 | 2.93 |
| 4.43 | 2.82 | 3.04 | 2.87 | 2.99 | 2.91 |
| 4.44 | 2.62 | 3.08 | 2.87 | 2.97 | 2.96 |
| 4.45 | 2.66 | 2.87 | 2.79 | 3.03 | 2.97 |
| 4.46 | 2.88 | 2.93 | 2.84 | 3.04 | 3.02 |
| 4.47 | 2.81 | 3.12 | 2.91 | 3.05 | 3.10 |
| 4.48 | 2.59 | 2.96 | 2.82 | 3.09 | 2.94 |
| 4.49 | 2.69 | 2.80 | 2.76 | 3.06 | 3.11 |
| 4.50 | 2.89 | 3.03 | 2.87 | 3.04 | 3.51 |
| 4.51 | 2.77 | 3.16 | 2.94 | 3.12 | 3.29 |
| 4.52 | 2.59 | 2.89 | 2.85 | 3.20 | 2.87 |
| 4.53 | 2.72 | 2.81 | 2.75 | 3.14 | 3.36 |
| 4.54 | 2.88 | 3.08 | 2.83 | 3.04 | 3.91 |
| 4.55 | 2.76 | 3.11 | 2.95 | 3.07 | 3.61 |
| 4.56 | 2.63 | 2.85 | 2.89 | 3.19 | 3.32 |
| 4.57 | 2.73 | 2.87 | 2.77 | 3.15 | 4.19 |
| 4.58 | 2.83 | 3.12 | 2.84 | 3.07 | 4.77 |
| 4.59 | 2.76 | 3.06 | 2.93 | 3.20 | 4.04 |
| 4.60 | 2.68 | 2.85 | 2.85 | 3.39 | 3.14 |
| 4.61 | 2.72 | 2.91 | 2.78 | 3.44 | 3.80 |
| 4.62 | 2.78 | 3.09 | 2.85 | 3.31 | 5.44 |
|  |  |  |  |  |  |
| *t* (s) | Pressure loads (kPa) | | | | |
| *hu* = 0.30 m *hd*= 0.30 m | | | | |
| *h* = 0.10 m | *h* = 0.20 m | *h* = 0.30 m | *h* = 0.40 m | *h* = 0.50 m |
| 4.63 | 2.76 | 3.03 | 2.94 | 3.40 | 5.43 |
| 4.64 | 2.70 | 2.89 | 2.90 | 3.63 | 4.42 |
| 4.65 | 2.74 | 2.94 | 2.80 | 3.63 | 4.49 |
| 4.66 | 2.79 | 3.04 | 2.83 | 3.47 | 5.64 |
| 4.67 | 2.71 | 3.00 | 2.97 | 3.56 | 6.26 |
| 4.68 | 2.70 | 2.92 | 2.95 | 3.66 | 5.80 |
| 4.69 | 2.81 | 2.95 | 2.85 | 3.53 | 5.52 |
| 4.70 | 2.75 | 3.04 | 2.91 | 3.49 | 5.99 |
| 4.71 | 2.63 | 3.02 | 3.03 | 3.82 | 6.68 |
| 4.72 | 2.76 | 2.89 | 2.99 | 4.17 | 6.80 |
| 4.73 | 2.89 | 2.93 | 2.96 | 4.23 | 7.12 |
| 4.74 | 2.72 | 3.08 | 3.08 | 4.26 | 8.35 |
| 4.75 | 2.59 | 2.99 | 3.17 | 4.56 | 8.09 |
| 4.76 | 2.75 | 2.84 | 3.05 | 4.78 | 6.29 |
| 4.77 | 2.88 | 3.00 | 3.02 | 4.98 | 4.75 |
| 4.78 | 2.75 | 3.14 | 3.21 | 5.41 | 4.44 |
| 4.79 | 2.63 | 2.93 | 3.31 | 5.53 | 4.62 |
| 4.80 | 2.74 | 2.80 | 3.18 | 4.95 | 4.66 |
| 4.81 | 2.83 | 3.03 | 3.11 | 4.18 | 5.06 |
| 4.82 | 2.73 | 3.13 | 3.25 | 4.59 | 5.81 |
| 4.83 | 2.68 | 2.93 | 3.33 | 5.19 | 6.21 |
| 4.84 | 2.79 | 2.86 | 3.26 | 4.95 | 6.23 |
| 4.85 | 2.80 | 3.03 | 3.20 | 4.70 | 5.61 |
| 4.86 | 2.69 | 3.04 | 3.25 | 4.83 | 4.86 |
| 4.87 | 2.71 | 2.91 | 3.40 | 5.21 | 4.67 |
| 4.88 | 2.79 | 2.95 | 3.45 | 5.34 | 4.91 |
| 4.89 | 2.74 | 3.06 | 3.33 | 4.86 | 5.32 |
| 4.90 | 2.71 | 2.99 | 3.47 | 4.61 | 5.63 |
| 4.91 | 2.79 | 2.89 | 3.72 | 4.74 | 5.40 |
| 4.92 | 2.77 | 2.96 | 3.57 | 4.76 | 5.07 |
| 4.93 | 2.69 | 3.04 | 3.24 | 4.86 | 5.09 |
| 4.94 | 2.73 | 3.00 | 3.42 | 5.02 | 4.81 |
| 4.95 | 2.81 | 2.96 | 4.00 | 4.95 | 4.29 |
| 4.96 | 2.79 | 2.96 | 3.81 | 4.71 | 4.29 |
| 4.97 | 2.72 | 2.97 | 3.48 | 4.77 | 4.95 |
| 4.98 | 2.69 | 2.99 | 3.49 | 4.98 | 5.54 |
| 4.99 | 2.74 | 3.00 | 3.76 | 4.93 | 5.51 |
| 5.00 | 2.81 | 2.95 | 3.76 | 4.71 | 5.10 |
| 5.01 | 2.78 | 2.94 | 3.54 | 4.67 | 5.05 |
| 5.02 | 2.70 | 2.99 | 3.58 | 4.75 | 5.25 |
|  |  |  |  |  |  |
| *t* (s) | Pressure loads (kPa) | | | | |
| *hu* = 0.30 m *hd*= 0.30 m | | | | |
| *h* = 0.10 m | *h* = 0.20 m | *h* = 0.30 m | *h* = 0.40 m | *h* = 0.50 m |
| 5.03 | 2.71 | 3.01 | 3.79 | 4.76 | 5.15 |
| 5.04 | 2.80 | 2.96 | 3.76 | 4.83 | 4.85 |
| 5.05 | 2.77 | 2.94 | 3.56 | 4.96 | 4.87 |
| 5.06 | 2.69 | 2.99 | 3.56 | 4.99 | 5.44 |
| 5.07 | 2.75 | 3.01 | 3.75 | 4.91 | 5.97 |
| 5.08 | 2.83 | 2.97 | 3.73 | 4.89 | 5.69 |
| 5.09 | 2.73 | 2.95 | 3.53 | 4.74 | 5.26 |
| 5.10 | 2.68 | 2.99 | 3.51 | 4.63 | 5.22 |
| 5.11 | 2.79 | 2.99 | 3.71 | 4.70 | 5.22 |
| 5.12 | 2.81 | 2.97 | 3.76 | 4.90 | 5.37 |
| 5.13 | 2.70 | 2.98 | 3.57 | 5.05 | 5.38 |
| 5.14 | 2.73 | 2.98 | 3.47 | 4.93 | 5.06 |
| 5.15 | 2.82 | 2.96 | 3.61 | 4.88 | 5.37 |
| 5.16 | 2.75 | 2.94 | 3.73 | 4.84 | 5.92 |
| 5.17 | 2.69 | 2.99 | 3.64 | 4.70 | 5.55 |
| 5.18 | 2.78 | 3.04 | 3.52 | 4.75 | 5.08 |
| 5.19 | 2.79 | 2.98 | 3.56 | 4.87 | 5.11 |
| 5.20 | 2.70 | 2.89 | 3.67 | 5.02 | 5.29 |
| 5.21 | 2.74 | 2.95 | 3.69 | 5.06 | 5.41 |
| 5.22 | 2.81 | 3.06 | 3.64 | 4.95 | 5.07 |
| 5.23 | 2.73 | 3.01 | 3.60 | 4.89 | 4.71 |
| 5.24 | 2.70 | 2.91 | 3.60 | 4.86 | 5.17 |
| 5.25 | 2.82 | 2.97 | 3.64 | 4.83 | 5.68 |
| 5.26 | 2.80 | 3.01 | 3.70 | 4.80 | 5.48 |
| 5.27 | 2.66 | 2.95 | 3.72 | 4.74 | 5.20 |
| 5.28 | 2.72 | 2.96 | 3.70 | 4.92 | 5.05 |
| 5.29 | 2.86 | 3.02 | 3.67 | 5.15 | 4.96 |
| 5.30 | 2.75 | 2.98 | 3.69 | 5.19 | 5.01 |
| 5.31 | 2.66 | 2.93 | 3.73 | 4.95 | 4.88 |
| 5.32 | 2.80 | 2.96 | 3.75 | 4.66 | 4.78 |
| 5.33 | 2.83 | 3.01 | 3.74 | 4.64 | 4.96 |
| 5.34 | 2.67 | 3.01 | 3.72 | 4.68 | 5.06 |
| 5.35 | 2.71 | 2.94 | 3.73 | 4.89 | 5.05 |
| 5.36 | 2.87 | 2.93 | 3.77 | 5.09 | 4.86 |
| 5.37 | 2.80 | 2.99 | 3.77 | 5.01 | 4.99 |
| 5.38 | 2.61 | 3.01 | 3.69 | 4.83 | 5.27 |
| 5.39 | 2.71 | 2.97 | 3.67 | 4.58 | 5.20 |
| 5.40 | 2.91 | 2.96 | 3.77 | 4.45 | 4.87 |
| 5.41 | 2.79 | 2.97 | 3.76 | 4.50 | 4.51 |
| 5.42 | 2.62 | 2.98 | 3.59 | 4.65 | 4.44 |
|  |  |  |  |  |  |
| *t* (s) | Pressure loads (kPa) | | | | |
| *hu* = 0.30 m *hd*= 0.30 m | | | | |
| *h* = 0.10 m | *h* = 0.20 m | *h* = 0.30 m | *h* = 0.40 m | *h* = 0.50 m |
| 5.43 | 2.74 | 2.98 | 3.52 | 4.85 | 4.70 |
| 5.44 | 2.88 | 2.96 | 3.65 | 4.89 | 4.94 |
| 5.45 | 2.76 | 2.99 | 3.65 | 4.72 | 4.88 |
| 5.46 | 2.66 | 3.01 | 3.43 | 4.45 | 4.77 |
| 5.47 | 2.75 | 2.95 | 3.33 | 4.36 | 4.81 |
| 5.48 | 2.82 | 2.93 | 3.42 | 4.45 | 4.77 |
| 5.49 | 2.77 | 3.02 | 3.47 | 4.66 | 4.69 |
| 5.50 | 2.72 | 3.03 | 3.36 | 4.73 | 4.52 |
| 5.51 | 2.74 | 2.93 | 3.23 | 4.61 | 4.51 |
| 5.52 | 2.77 | 2.91 | 3.20 | 4.44 | 4.78 |
| 5.53 | 2.79 | 3.00 | 3.23 | 4.35 | 4.91 |
| 5.54 | 2.77 | 3.04 | 3.25 | 4.33 | 4.79 |
| 5.55 | 2.74 | 2.97 | 3.18 | 4.41 | 4.60 |
| 5.56 | 2.76 | 2.93 | 3.10 | 4.45 | 4.54 |
| 5.57 | 2.79 | 2.98 | 3.14 | 4.38 | 4.66 |
| 5.58 | 2.76 | 3.01 | 3.16 | 4.32 | 4.68 |
| 5.59 | 2.76 | 2.95 | 3.06 | 4.28 | 4.61 |
| 5.60 | 2.80 | 2.93 | 3.08 | 4.30 | 4.65 |
| 5.61 | 2.78 | 3.00 | 3.18 | 4.31 | 4.73 |
| 5.62 | 2.74 | 3.04 | 3.12 | 4.31 | 4.73 |
| 5.63 | 2.79 | 2.97 | 3.01 | 4.27 | 4.58 |
| 5.64 | 2.84 | 2.92 | 3.07 | 4.23 | 4.46 |
| 5.65 | 2.76 | 2.96 | 3.16 | 4.16 | 4.50 |
| 5.66 | 2.76 | 3.02 | 3.12 | 4.17 | 4.55 |
| 5.67 | 2.87 | 3.01 | 3.06 | 4.18 | 4.53 |
| 5.68 | 2.84 | 2.94 | 3.09 | 4.15 | 4.53 |
| 5.69 | 2.73 | 2.93 | 3.11 | 4.04 | 4.51 |
| 5.70 | 2.81 | 3.02 | 3.06 | 4.01 | 4.45 |
| 5.71 | 2.91 | 3.01 | 3.07 | 4.06 | 4.37 |
| 5.72 | 2.83 | 2.92 | 3.13 | 4.07 | 4.32 |
| 5.73 | 2.76 | 2.98 | 3.12 | 3.96 | 4.37 |
| 5.74 | 2.87 | 3.05 | 3.05 | 3.89 | 4.47 |
| 5.75 | 2.95 | 2.93 | 3.09 | 3.96 | 4.53 |
| 5.76 | 2.85 | 2.88 | 3.18 | 4.01 | 4.47 |
| 5.77 | 2.81 | 3.05 | 3.15 | 3.94 | 4.31 |
| 5.78 | 2.92 | 3.07 | 3.08 | 3.88 | 4.26 |
| 5.79 | 2.98 | 2.90 | 3.12 | 3.90 | 4.42 |
| 5.80 | 2.92 | 2.92 | 3.23 | 3.89 | 4.52 |
| 5.81 | 2.92 | 3.05 | 3.25 | 3.84 | 4.42 |
| 5.82 | 3.00 | 3.00 | 3.15 | 3.86 | 4.28 |
|  |  |  |  |  |  |
| *t* (s) | Pressure loads (kPa) | | | | |
| *hu* = 0.30 m *hd*= 0.30 m | | | | |
| *h* = 0.10 m | *h* = 0.20 m | *h* = 0.30 m | *h* = 0.40 m | *h* = 0.50 m |
| 5.83 | 3.00 | 2.90 | 3.12 | 3.88 | 4.22 |
| 5.84 | 2.94 | 3.01 | 3.27 | 3.78 | 4.30 |
| 5.85 | 3.02 | 3.08 | 3.36 | 3.72 | 4.40 |
| 5.86 | 3.15 | 2.92 | 3.26 | 3.75 | 4.37 |
| 5.87 | 3.08 | 2.87 | 3.19 | 3.79 | 4.26 |
| 5.88 | 2.98 | 3.08 | 3.25 | 3.76 | 4.21 |
| 5.89 | 3.13 | 3.10 | 3.33 | 3.71 | 4.23 |
| 5.90 | 3.28 | 2.87 | 3.37 | 3.67 | 4.28 |
| 5.91 | 3.17 | 2.91 | 3.35 | 3.65 | 4.28 |
| 5.92 | 3.09 | 3.12 | 3.24 | 3.70 | 4.24 |
| 5.93 | 3.27 | 3.03 | 3.22 | 3.72 | 4.21 |
| 5.94 | 3.40 | 2.87 | 3.36 | 3.64 | 4.16 |
| 5.95 | 3.28 | 3.02 | 3.40 | 3.59 | 4.19 |
| 5.96 | 3.24 | 3.13 | 3.27 | 3.64 | 4.28 |
| 5.97 | 3.42 | 2.94 | 3.24 | 3.66 | 4.34 |
| 5.98 | 3.51 | 2.92 | 3.34 | 3.54 | 4.31 |
| 5.99 | 3.41 | 3.12 | 3.34 | 3.49 | 4.23 |
| 6.00 | 3.41 | 3.08 | 3.27 | 3.61 | 4.17 |
| 6.01 | 3.54 | 2.90 | 3.32 | 3.68 | 4.21 |
| 6.02 | 3.61 | 3.01 | 3.41 | 3.60 | 4.27 |
| 6.03 | 3.56 | 3.17 | 3.36 | 3.53 | 4.30 |
| 6.04 | 3.56 | 3.06 | 3.28 | 3.54 | 4.30 |
| 6.05 | 3.65 | 2.93 | 3.35 | 3.55 | 4.29 |
| 6.06 | 3.70 | 3.09 | 3.44 | 3.55 | 4.36 |
| 6.07 | 3.67 | 3.22 | 3.42 | 3.57 | 4.37 |
| 6.08 | 3.65 | 3.06 | 3.39 | 3.55 | 4.29 |
| 6.09 | 3.69 | 2.97 | 3.47 | 3.49 | 4.25 |
| 6.10 | 3.92 | 3.17 | 3.53 | 3.48 | 4.29 |
| 6.11 | 3.76 | 3.26 | 3.48 | 3.55 | 4.36 |
| 6.12 | 3.68 | 3.09 | 3.42 | 3.58 | 4.46 |
| 6.13 | 3.64 | 3.09 | 3.49 | 3.47 | 4.43 |
| 6.14 | 3.68 | 3.30 | 3.61 | 3.36 | 4.30 |
| 6.15 | 3.72 | 3.29 | 3.60 | 3.41 | 4.28 |
| 6.16 | 3.71 | 3.12 | 3.53 | 3.55 | 4.37 |
| 6.17 | 3.62 | 3.23 | 3.55 | 3.58 | 4.49 |
| 6.18 | 3.58 | 3.45 | 3.64 | 3.50 | 4.51 |
| 6.19 | 3.62 | 3.33 | 3.64 | 3.42 | 4.46 |
| 6.20 | 3.67 | 3.18 | 3.55 | 3.44 | 4.42 |
| 6.21 | 3.66 | 3.39 | 3.53 | 3.52 | 4.44 |
| 6.22 | 3.61 | 3.59 | 3.59 | 3.55 | 4.51 |
|  |  |  |  |  |  |
| *t* (s) | Pressure loads (kPa) | | | | |
| *hu* = 0.30 m *hd*= 0.30 m | | | | |
| *h* = 0.10 m | *h* = 0.20 m | *h* = 0.30 m | *h* = 0.40 m | *h* = 0.50 m |
| 6.23 | 3.58 | 3.41 | 3.63 | 3.48 | 4.55 |
| 6.24 | 3.58 | 3.30 | 3.59 | 3.45 | 4.54 |
| 6.25 | 3.59 | 3.59 | 3.51 | 3.46 | 4.50 |
| 6.26 | 3.62 | 3.75 | 3.51 | 3.47 | 4.51 |
| 6.27 | 3.63 | 3.53 | 3.59 | 3.43 | 4.54 |
| 6.28 | 3.62 | 3.47 | 3.61 | 3.46 | 4.54 |
| 6.29 | 3.57 | 3.71 | 3.52 | 3.55 | 4.56 |
| 6.30 | 3.55 | 3.82 | 3.49 | 3.58 | 4.57 |
| 6.31 | 3.59 | 3.70 | 3.56 | 3.48 | 4.59 |
| 6.32 | 3.65 | 3.72 | 3.59 | 3.41 | 4.62 |
| 6.33 | 3.65 | 3.89 | 3.56 | 3.50 | 4.61 |
| 6.34 | 3.60 | 3.90 | 3.55 | 3.59 | 4.60 |
| 6.35 | 3.58 | 3.83 | 3.54 | 3.58 | 4.62 |
| 6.36 | 3.61 | 3.91 | 3.51 | 3.50 | 4.65 |
| 6.37 | 3.66 | 4.11 | 3.58 | 3.52 | 4.66 |
| 6.38 | 3.69 | 4.04 | 3.67 | 3.62 | 4.68 |
| 6.39 | 3.68 | 3.99 | 3.65 | 3.66 | 4.68 |
| 6.40 | 3.65 | 4.01 | 3.58 | 3.61 | 4.63 |
| 6.41 | 3.65 | 4.00 | 3.63 | 3.59 | 4.67 |
| 6.42 | 3.69 | 3.89 | 3.73 | 3.65 | 4.71 |
| 6.43 | 3.70 | 3.90 | 3.79 | 3.72 | 4.70 |
| 6.44 | 3.68 | 3.98 | 3.76 | 3.71 | 4.68 |
| 6.45 | 3.67 | 3.95 | 3.76 | 3.70 | 4.64 |
| 6.46 | 3.66 | 3.84 | 3.82 | 3.70 | 4.66 |
| 6.47 | 3.63 | 3.81 | 3.88 | 3.74 | 4.71 |
| 6.48 | 3.60 | 3.86 | 3.86 | 3.80 | 4.71 |
| 6.49 | 3.63 | 3.87 | 3.82 | 3.84 | 4.71 |
| 6.50 | 3.69 | 3.83 | 3.81 | 3.82 | 4.73 |
| 6.51 | 3.65 | 3.83 | 3.84 | 3.78 | 4.74 |
| 6.52 | 3.47 | 3.85 | 3.83 | 3.81 | 4.74 |
| 6.53 | 3.41 | 3.82 | 3.77 | 3.93 | 4.72 |
| 6.54 | 3.53 | 3.79 | 3.73 | 4.02 | 4.76 |
| 6.55 | 3.55 | 3.86 | 3.74 | 4.00 | 4.84 |
| 6.56 | 3.38 | 3.90 | 3.78 | 3.96 | 4.88 |
| 6.57 | 3.27 | 3.83 | 3.76 | 3.99 | 4.86 |
| 6.58 | 3.29 | 3.79 | 3.68 | 4.09 | 4.83 |
| 6.59 | 3.31 | 3.84 | 3.65 | 4.18 | 4.84 |
| 6.60 | 3.30 | 3.89 | 3.69 | 4.22 | 4.88 |
| 6.61 | 3.24 | 3.89 | 3.76 | 4.21 | 4.93 |
| 6.62 | 3.12 | 3.87 | 3.78 | 4.22 | 4.97 |
|  |  |  |  |  |  |
| *t* (s) | Pressure loads (kPa) | | | | |
| *hu* = 0.30 m *hd*= 0.30 m | | | | |
| *h* = 0.10 m | *h* = 0.20 m | *h* = 0.30 m | *h* = 0.40 m | *h* = 0.50 m |
| 6.63 | 3.09 | 3.86 | 3.75 | 4.27 | 4.99 |
| 6.64 | 3.19 | 3.88 | 3.72 | 4.37 | 5.00 |
| 6.65 | 3.14 | 3.93 | 3.76 | 4.46 | 5.00 |
| 6.66 | 2.99 | 3.95 | 3.83 | 4.53 | 4.95 |
| 6.67 | 2.99 | 3.93 | 3.87 | 4.55 | 4.93 |
| 6.68 | 3.08 | 3.94 | 3.84 | 4.53 | 4.96 |
| 6.69 | 3.03 | 3.97 | 3.86 | 4.57 | 5.04 |
| 6.70 | 2.94 | 4.00 | 3.92 | 4.68 | 5.15 |
| 6.71 | 2.94 | 4.03 | 3.97 | 4.78 | 5.15 |
| 6.72 | 2.96 | 4.04 | 3.94 | 4.81 | 5.03 |
| 6.73 | 2.99 | 4.03 | 3.91 | 4.80 | 4.95 |
| 6.74 | 2.99 | 4.00 | 3.93 | 4.84 | 5.05 |
| 6.75 | 2.90 | 4.01 | 3.97 | 4.89 | 5.22 |
| 6.76 | 2.83 | 4.07 | 4.00 | 4.93 | 5.27 |
| 6.77 | 2.91 | 4.09 | 4.01 | 4.98 | 5.26 |
| 6.78 | 2.97 | 4.05 | 4.02 | 5.05 | 5.26 |
| 6.79 | 2.92 | 3.99 | 4.02 | 5.12 | 5.21 |
| 6.80 | 2.89 | 3.93 | 4.05 | 5.14 | 5.15 |
| 6.81 | 2.90 | 3.90 | 4.12 | 5.19 | 5.17 |
| 6.82 | 2.91 | 3.92 | 4.21 | 5.22 | 5.24 |
| 6.83 | 2.93 | 3.95 | 4.28 | 5.12 | 5.33 |
| 6.84 | 2.95 | 3.87 | 4.31 | 5.44 | 5.42 |
| 6.85 | 2.92 | 3.75 | 4.32 | 5.69 | 5.43 |
| 6.86 | 2.91 | 3.69 | 4.32 | 5.60 | 5.35 |
| 6.87 | 2.96 | 3.71 | 4.32 | 6.07 | 5.35 |
| 6.88 | 2.99 | 3.69 | 4.33 | 5.68 | 5.45 |
| 6.89 | 2.97 | 3.63 | 4.36 | 4.85 | 5.46 |
| 6.90 | 3.00 | 3.55 | 4.39 | 5.03 | 5.41 |
| 6.91 | 3.06 | 3.48 | 4.40 | 5.50 | 5.50 |
| 6.92 | 3.03 | 3.50 | 4.38 | 5.60 | 5.68 |
| 6.93 | 2.99 | 3.54 | 4.34 | 5.59 | 5.82 |
| 6.94 | 3.11 | 3.48 | 4.38 | 5.67 | 5.85 |
| 6.95 | 3.23 | 3.42 | 4.46 | 5.81 | 5.75 |
| 6.96 | 3.17 | 3.48 | 4.48 | 5.70 | 5.62 |
| 6.97 | 3.08 | 3.54 | 4.48 | 5.39 | 5.66 |
| 6.98 | 3.20 | 3.47 | 4.50 | 5.29 | 5.80 |
| 6.99 | 3.34 | 3.41 | 4.57 | 5.38 | 5.84 |
| 7.00 | 3.30 | 3.44 | 4.61 | 5.44 | 5.84 |
| 7.01 | 3.23 | 3.50 | 4.64 | 5.52 | 5.98 |
| 7.02 | 3.35 | 3.50 | 4.67 | 5.62 | 6.33 |
|  |  |  |  |  |  |
| *t* (s) | Pressure loads (kPa) | | | | |
| *hu* = 0.30 m *hd*= 0.30 m | | | | |
| *h* = 0.10 m | *h* = 0.20 m | *h* = 0.30 m | *h* = 0.40 m | *h* = 0.50 m |
| 7.03 | 3.48 | 3.53 | 4.68 | 5.64 | 6.59 |
| 7.04 | 3.43 | 3.56 | 4.69 | 5.63 | 6.41 |
| 7.05 | 3.36 | 3.53 | 4.73 | 5.61 | 6.06 |
| 7.06 | 3.44 | 3.55 | 4.83 | 5.59 | 6.02 |
| 7.07 | 3.56 | 3.65 | 4.82 | 5.61 | 6.22 |
| 7.08 | 3.56 | 3.66 | 4.80 | 5.63 | 6.19 |
| 7.09 | 3.50 | 3.57 | 4.86 | 5.65 | 5.98 |
| 7.10 | 3.52 | 3.58 | 4.84 | 5.74 | 6.12 |
| 7.11 | 3.58 | 3.64 | 4.83 | 5.82 | 6.43 |
| 7.12 | 3.58 | 3.60 | 4.86 | 5.85 | 6.50 |
| 7.13 | 3.53 | 3.50 | 4.79 | 5.89 | 6.42 |
| 7.14 | 3.53 | 3.49 | 4.82 | 5.94 | 6.38 |
| 7.15 | 3.54 | 3.56 | 5.00 | 5.99 | 6.34 |
| 7.16 | 3.52 | 3.56 | 5.07 | 5.99 | 6.33 |
| 7.17 | 3.51 | 3.47 | 4.90 | 5.95 | 6.29 |
| 7.18 | 3.54 | 3.42 | 4.73 | 5.99 | 6.17 |
| 7.19 | 3.53 | 3.50 | 4.65 | 6.11 | 6.10 |
| 7.20 | 3.45 | 3.55 | 4.62 | 6.10 | 6.26 |
| 7.21 | 3.43 | 3.45 | 4.69 | 6.01 | 6.42 |
| 7.22 | 3.50 | 3.38 | 4.83 | 5.97 | 6.44 |
| 7.23 | 3.54 | 3.45 | 4.91 | 5.92 | 6.38 |
| 7.24 | 3.48 | 3.48 | 4.95 | 5.85 | 6.34 |
| 7.25 | 3.41 | 3.35 | 4.87 | 5.89 | 6.31 |
| 7.26 | 3.46 | 3.32 | 4.73 | 5.98 | 6.19 |
| 7.27 | 3.53 | 3.40 | 4.68 | 6.01 | 6.06 |
| 7.28 | 3.53 | 3.42 | 4.70 | 6.06 | 6.07 |
| 7.29 | 3.49 | 3.36 | 4.79 | 6.11 | 6.16 |
| 7.30 | 3.50 | 3.38 | 4.85 | 6.09 | 6.19 |
| 7.31 | 3.56 | 3.41 | 4.87 | 6.04 | 6.26 |
| 7.32 | 3.59 | 3.40 | 4.90 | 5.98 | 6.35 |
| 7.33 | 3.57 | 3.39 | 4.81 | 5.94 | 6.29 |
| 7.34 | 3.56 | 3.45 | 4.76 | 5.93 | 6.26 |
| 7.35 | 3.60 | 3.48 | 4.85 | 5.91 | 6.25 |
| 7.36 | 3.66 | 3.48 | 4.94 | 5.92 | 6.13 |
| 7.37 | 3.71 | 3.44 | 4.94 | 6.02 | 5.98 |
| 7.38 | 3.72 | 3.47 | 4.93 | 6.04 | 5.97 |
| 7.39 | 3.70 | 3.56 | 4.94 | 5.91 | 6.02 |
| 7.40 | 3.69 | 3.61 | 4.96 | 5.95 | 6.07 |
| 7.41 | 3.74 | 3.53 | 4.94 | 6.07 | 6.16 |
| 7.42 | 3.82 | 3.50 | 4.84 | 5.98 | 6.20 |
|  |  |  |  |  |  |
| *t* (s) | Pressure loads (kPa) | | | | |
| *hu* = 0.30 m *hd*= 0.30 m | | | | |
| *h* = 0.10 m | *h* = 0.20 m | *h* = 0.30 m | *h* = 0.40 m | *h* = 0.50 m |
| 7.43 | 3.86 | 3.60 | 4.76 | 5.82 | 6.17 |
| 7.44 | 3.80 | 3.67 | 4.78 | 5.85 | 6.14 |
| 7.45 | 3.75 | 3.63 | 4.83 | 5.91 | 6.14 |
| 7.46 | 3.80 | 3.64 | 4.90 | 6.03 | 6.10 |
| 7.47 | 3.88 | 3.62 | 4.97 | 6.12 | 5.94 |
| 7.48 | 3.90 | 3.60 | 4.97 | 5.98 | 5.82 |
| 7.49 | 3.82 | 3.64 | 4.88 | 5.98 | 5.87 |
| 7.50 | 3.73 | 3.70 | 4.79 | 6.01 | 5.98 |
| 7.51 | 3.73 | 3.58 | 4.76 | 5.78 | 5.98 |
| 7.52 | 3.77 | 3.50 | 4.77 | 5.64 | 6.05 |
| 7.53 | 3.78 | 3.63 | 4.84 | 5.79 | 6.14 |
| 7.54 | 3.73 | 3.72 | 4.91 | 5.85 | 6.04 |
| 7.55 | 3.67 | 3.61 | 4.93 | 5.88 | 6.00 |
| 7.56 | 3.65 | 3.50 | 4.84 | 5.89 | 6.09 |
| 7.57 | 3.67 | 3.61 | 4.69 | 5.81 | 5.94 |
| 7.58 | 3.69 | 3.77 | 4.58 | 5.83 | 5.66 |
| 7.59 | 3.67 | 3.73 | 4.57 | 5.81 | 5.70 |
| 7.60 | 3.63 | 3.58 | 4.71 | 5.66 | 5.95 |
| 7.61 | 3.64 | 3.60 | 4.76 | 5.61 | 5.96 |
| 7.62 | 3.69 | 3.78 | 4.73 | 5.62 | 5.86 |
| 7.63 | 3.71 | 3.82 | 4.56 | 5.70 | 5.89 |
| 7.64 | 3.68 | 3.73 | 4.44 | 5.81 | 6.03 |
| 7.65 | 3.68 | 3.78 | 4.49 | 5.73 | 5.99 |
| 7.66 | 3.72 | 3.97 | 4.60 | 5.67 | 5.79 |
| 7.67 | 3.74 | 3.97 | 4.62 | 5.77 | 5.69 |
| 7.68 | 3.74 | 3.85 | 4.59 | 5.68 | 5.76 |
| 7.69 | 3.75 | 3.92 | 4.51 | 5.53 | 5.75 |
| 7.70 | 3.76 | 4.15 | 4.42 | 5.51 | 5.70 |
| 7.71 | 3.76 | 4.20 | 4.43 | 5.55 | 5.71 |
| 7.72 | 3.81 | 4.12 | 4.51 | 5.64 | 5.74 |
| 7.73 | 3.89 | 4.18 | 4.58 | 5.64 | 5.78 |
| 7.74 | 3.94 | 4.37 | 4.55 | 5.49 | 5.79 |
| 7.75 | 3.93 | 4.42 | 4.47 | 5.54 | 5.68 |
| 7.76 | 3.94 | 4.37 | 4.43 | 5.71 | 5.55 |
| 7.77 | 4.03 | 4.45 | 4.49 | 5.56 | 5.61 |
| 7.78 | 4.11 | 4.55 | 4.58 | 5.35 | 5.70 |
| 7.79 | 4.14 | 4.57 | 4.61 | 5.39 | 5.58 |
| 7.80 | 4.15 | 4.53 | 4.58 | 5.48 | 5.47 |
| 7.81 | 4.22 | 4.61 | 4.45 | 5.48 | 5.57 |
| 7.82 | 4.29 | 4.76 | 4.46 | 5.47 | 5.64 |
|  |  |  |  |  |  |
| *t* (s) | Pressure loads (kPa) | | | | |
| *hu* = 0.30 m *hd*= 0.30 m | | | | |
| *h* = 0.10 m | *h* = 0.20 m | *h* = 0.30 m | *h* = 0.40 m | *h* = 0.50 m |
| 7.83 | 4.31 | 4.80 | 4.59 | 5.50 | 5.57 |
| 7.84 | 4.28 | 4.74 | 4.67 | 5.46 | 5.49 |
| 7.85 | 4.28 | 4.72 | 4.61 | 5.41 | 5.51 |
| 7.86 | 4.33 | 4.83 | 4.51 | 5.38 | 5.53 |
| 7.87 | 4.38 | 4.76 | 4.51 | 5.32 | 5.49 |
| 7.88 | 4.39 | 4.66 | 4.58 | 5.30 | 5.43 |
| 7.89 | 4.38 | 4.75 | 4.62 | 5.38 | 5.40 |
| 7.90 | 4.35 | 4.87 | 4.64 | 5.40 | 5.44 |
| 7.91 | 4.29 | 4.74 | 4.64 | 5.39 | 5.52 |
| 7.92 | 4.27 | 4.43 | 4.58 | 5.40 | 5.48 |
| 7.93 | 4.28 | 4.61 | 4.52 | 5.35 | 5.38 |
| 7.94 | 4.29 | 4.87 | 4.48 | 5.28 | 5.40 |
| 7.95 | 4.28 | 4.42 | 4.50 | 5.22 | 5.47 |
| 7.96 | 4.30 | 4.37 | 4.56 | 5.18 | 5.46 |
| 7.97 | 4.29 | 4.78 | 4.56 | 5.22 | 5.38 |
| 7.98 | 4.24 | 4.82 | 4.50 | 5.27 | 5.35 |
| 7.99 | 4.23 | 4.63 | 4.49 | 5.25 | 5.42 |
| 8.00 | 4.23 | 4.61 | 4.55 | 5.22 | 5.47 |
| 8.01 | 4.20 | 4.85 | 4.54 | 5.15 | 5.37 |
| 8.02 | 4.18 | 4.79 | 4.53 | 5.09 | 5.27 |
| 8.03 | 4.17 | 4.53 | 4.48 | 5.16 | 5.36 |
| 8.04 | 4.20 | 4.71 | 4.50 | 5.21 | 5.43 |
| 8.05 | 4.24 | 4.91 | 4.57 | 5.12 | 5.38 |
| 8.06 | 4.27 | 4.79 | 4.59 | 5.09 | 5.38 |
| 8.07 | 4.32 | 4.78 | 4.56 | 5.10 | 5.45 |
| 8.08 | 4.40 | 4.90 | 4.52 | 5.07 | 5.46 |
| 8.09 | 4.40 | 5.07 | 4.50 | 5.06 | 5.36 |
| 8.10 | 4.36 | 5.08 | 4.52 | 5.06 | 5.29 |
| 8.11 | 4.44 | 4.97 | 4.51 | 5.05 | 5.33 |
| 8.12 | 4.57 | 5.04 | 4.52 | 5.02 | 5.39 |
| 8.13 | 4.56 | 5.01 | 4.52 | 5.04 | 5.37 |
| 8.14 | 4.42 | 4.84 | 4.54 | 5.03 | 5.39 |
| 8.15 | 4.39 | 4.90 | 4.52 | 4.96 | 5.48 |
| 8.16 | 4.43 | 5.01 | 4.49 | 4.91 | 5.44 |
| 8.17 | 4.50 | 5.03 | 4.48 | 4.93 | 5.35 |
| 8.18 | 4.55 | 5.04 | 4.51 | 4.96 | 5.36 |
| 8.19 | 4.54 | 5.09 | 4.58 | 4.92 | 5.38 |
| 8.20 | 4.53 | 5.11 | 4.58 | 4.89 | 5.37 |
| 8.21 | 4.49 | 5.01 | 4.52 | 4.91 | 5.39 |
| 8.22 | 4.46 | 4.95 | 4.51 | 4.92 | 5.45 |
|  |  |  |  |  |  |
| *t* (s) | Pressure loads (kPa) | | | | |
| *hu* = 0.30 m *hd*= 0.30 m | | | | |
| *h* = 0.10 m | *h* = 0.20 m | *h* = 0.30 m | *h* = 0.40 m | *h* = 0.50 m |
| 8.23 | 4.46 | 4.98 | 4.58 | 4.87 | 5.52 |
| 8.24 | 4.46 | 5.02 | 4.62 | 4.80 | 5.49 |
| 8.25 | 4.49 | 5.06 | 4.56 | 4.77 | 5.41 |
| 8.26 | 4.50 | 5.09 | 4.55 | 4.81 | 5.43 |
| 8.27 | 4.48 | 5.02 | 4.55 | 4.85 | 5.47 |
| 8.28 | 4.45 | 5.02 | 4.57 | 4.83 | 5.45 |
| 8.29 | 4.40 | 5.04 | 4.61 | 4.75 | 5.44 |
| 8.30 | 4.34 | 4.97 | 4.57 | 4.75 | 5.52 |
| 8.31 | 4.36 | 5.02 | 4.54 | 4.80 | 5.60 |
| 8.32 | 4.43 | 5.09 | 4.58 | 4.81 | 5.57 |
| 8.33 | 4.48 | 5.07 | 4.57 | 4.76 | 5.53 |
| 8.34 | 4.45 | 5.12 | 4.53 | 4.70 | 5.56 |
| 8.35 | 4.37 | 5.16 | 4.50 | 4.71 | 5.54 |
| 8.36 | 4.30 | 4.98 | 4.54 | 4.74 | 5.49 |
| 8.37 | 4.32 | 4.99 | 4.57 | 4.75 | 5.52 |
| 8.38 | 4.38 | 5.07 | 4.54 | 4.72 | 5.56 |
| 8.39 | 4.41 | 5.05 | 4.47 | 4.70 | 5.59 |
| 8.40 | 4.38 | 5.12 | 4.44 | 4.70 | 5.62 |
| 8.41 | 4.35 | 5.15 | 4.49 | 4.71 | 5.59 |
| 8.42 | 4.34 | 5.07 | 4.52 | 4.69 | 5.55 |
| 8.43 | 4.34 | 5.08 | 4.48 | 4.66 | 5.57 |
| 8.44 | 4.32 | 5.04 | 4.43 | 4.69 | 5.60 |
| 8.45 | 4.33 | 5.03 | 4.42 | 4.71 | 5.59 |
| 8.46 | 4.35 | 5.03 | 4.44 | 4.68 | 5.58 |
| 8.47 | 4.38 | 5.02 | 4.44 | 4.66 | 5.62 |
| 8.48 | 4.37 | 5.14 | 4.41 | 4.67 | 5.67 |
| 8.49 | 4.32 | 5.13 | 4.42 | 4.67 | 5.66 |
| 8.50 | 4.29 | 5.03 | 4.47 | 4.66 | 5.62 |
| 8.51 | 4.30 | 4.99 | 4.47 | 4.66 | 5.63 |
| 8.52 | 4.33 | 5.01 | 4.38 | 4.64 | 5.65 |
| 8.53 | 4.33 | 5.02 | 4.37 | 4.63 | 5.63 |
| 8.54 | 4.25 | 5.02 | 4.44 | 4.64 | 5.66 |
| 8.55 | 4.23 | 5.01 | 4.52 | 4.64 | 5.69 |
| 8.56 | 4.24 | 4.96 | 4.50 | 4.63 | 5.68 |
| 8.57 | 4.21 | 4.93 | 4.40 | 4.64 | 5.67 |
| 8.58 | 4.15 | 4.94 | 4.37 | 4.65 | 5.71 |
| 8.59 | 4.13 | 4.93 | 4.46 | 4.66 | 5.71 |
| 8.60 | 4.17 | 4.94 | 4.53 | 4.65 | 5.64 |
| 8.61 | 4.18 | 4.93 | 4.50 | 4.65 | 5.62 |
| 8.62 | 4.12 | 4.90 | 4.42 | 4.67 | 5.68 |
|  |  |  |  |  |  |
| *t* (s) | Pressure loads (kPa) | | | | |
| *hu* = 0.30 m *hd*= 0.30 m | | | | |
| *h* = 0.10 m | *h* = 0.20 m | *h* = 0.30 m | *h* = 0.40 m | *h* = 0.50 m |
| 8.63 | 4.06 | 4.88 | 4.40 | 4.71 | 5.68 |
| 8.64 | 4.07 | 4.85 | 4.45 | 4.75 | 5.66 |
| 8.65 | 4.09 | 4.85 | 4.49 | 4.70 | 5.72 |
| 8.66 | 4.07 | 4.85 | 4.48 | 4.63 | 5.75 |
| 8.67 | 4.03 | 4.84 | 4.47 | 4.67 | 5.71 |
| 8.68 | 4.02 | 4.83 | 4.47 | 4.76 | 5.67 |
| 8.69 | 4.00 | 4.81 | 4.45 | 4.81 | 5.68 |
| 8.70 | 3.95 | 4.78 | 4.42 | 4.78 | 5.69 |
| 8.71 | 3.91 | 4.80 | 4.41 | 4.73 | 5.68 |
| 8.72 | 3.92 | 4.79 | 4.46 | 4.72 | 5.67 |
| 8.73 | 3.95 | 4.76 | 4.51 | 4.75 | 5.71 |
| 8.74 | 3.95 | 4.74 | 4.51 | 4.80 | 5.75 |
| 8.75 | 3.87 | 4.75 | 4.47 | 4.80 | 5.71 |
| 8.76 | 3.79 | 4.78 | 4.43 | 4.78 | 5.69 |
| 8.77 | 3.81 | 4.76 | 4.43 | 4.79 | 5.73 |
| 8.78 | 3.89 | 4.73 | 4.42 | 4.84 | 5.74 |
| 8.79 | 3.88 | 4.69 | 4.46 | 4.89 | 5.69 |
| 8.80 | 3.79 | 4.66 | 4.53 | 4.85 | 5.69 |
| 8.81 | 3.74 | 4.63 | 4.54 | 4.78 | 5.74 |
| 8.82 | 3.78 | 4.63 | 4.49 | 4.81 | 5.72 |
| 8.83 | 3.84 | 4.67 | 4.44 | 4.92 | 5.69 |
| 8.84 | 3.84 | 4.65 | 4.45 | 5.00 | 5.74 |
| 8.85 | 3.79 | 4.57 | 4.53 | 4.98 | 5.75 |
| 8.86 | 3.77 | 4.50 | 4.58 | 4.97 | 5.69 |
| 8.87 | 3.83 | 4.50 | 4.56 | 4.96 | 5.70 |
| 8.88 | 3.85 | 4.52 | 4.53 | 4.95 | 5.70 |
| 8.89 | 3.77 | 4.52 | 4.54 | 4.96 | 5.68 |
| 8.90 | 3.75 | 4.49 | 4.58 | 5.03 | 5.69 |
| 8.91 | 3.85 | 4.43 | 4.57 | 5.12 | 5.69 |
| 8.92 | 3.88 | 4.37 | 4.57 | 5.15 | 5.69 |
| 8.93 | 3.77 | 4.37 | 4.58 | 5.14 | 5.72 |
| 8.94 | 3.70 | 4.41 | 4.64 | 5.11 | 5.71 |
| 8.95 | 3.78 | 4.40 | 4.65 | 5.10 | 5.69 |
| 8.96 | 3.86 | 4.34 | 4.61 | 5.12 | 5.69 |
| 8.97 | 3.80 | 4.29 | 4.58 | 5.15 | 5.69 |
| 8.98 | 3.70 | 4.26 | 4.61 | 5.19 | 5.70 |
| 8.99 | 3.68 | 4.26 | 4.68 | 5.25 | 5.74 |
| 9.00 | 3.74 | 4.23 | 4.69 | 5.28 | 5.74 |
| 9.01 | 3.78 | 4.20 | 4.66 | 5.23 | 5.71 |
| 9.02 | 3.75 | 4.18 | 4.64 | 5.24 | 5.75 |
|  |  |  |  |  |  |
| *t* (s) | Pressure loads (kPa) | | | | |
| *hu* = 0.30 m *hd*= 0.30 m | | | | |
| *h* = 0.10 m | *h* = 0.20 m | *h* = 0.30 m | *h* = 0.40 m | *h* = 0.50 m |
| 9.03 | 3.70 | 4.18 | 4.67 | 5.49 | 5.80 |
| 9.04 | 3.71 | 4.15 | 4.71 | 5.53 | 5.76 |
| 9.05 | 3.75 | 4.10 | 4.72 | 5.19 | 5.73 |
| 9.06 | 3.75 | 4.07 | 4.72 | 5.11 | 5.80 |
| 9.07 | 3.70 | 4.08 | 4.72 | 5.35 | 5.82 |
| 9.08 | 3.69 | 4.07 | 4.73 | 5.48 | 5.78 |
| 9.09 | 3.72 | 4.04 | 4.74 | 5.45 | 5.80 |
| 9.10 | 3.76 | 4.01 | 4.76 | 5.43 | 5.90 |
| 9.11 | 3.73 | 3.99 | 4.78 | 5.51 | 5.89 |
| 9.12 | 3.67 | 3.99 | 4.82 | 5.57 | 5.82 |
| 9.13 | 3.65 | 3.98 | 4.83 | 5.54 | 5.85 |
| 9.14 | 3.70 | 3.94 | 4.80 | 5.50 | 5.90 |
| 9.15 | 3.73 | 3.90 | 4.77 | 5.53 | 5.88 |
| 9.16 | 3.70 | 3.89 | 4.82 | 5.61 | 5.89 |
| 9.17 | 3.66 | 3.91 | 4.91 | 5.69 | 5.95 |
| 9.18 | 3.65 | 3.89 | 4.96 | 5.72 | 5.96 |
| 9.19 | 3.67 | 3.82 | 4.94 | 5.71 | 5.97 |
| 9.20 | 3.69 | 3.83 | 4.94 | 5.74 | 6.03 |
| 9.21 | 3.70 | 3.86 | 4.96 | 5.79 | 6.05 |
| 9.22 | 3.72 | 3.81 | 4.94 | 5.77 | 6.03 |
| 9.23 | 3.70 | 3.77 | 4.96 | 5.76 | 6.04 |
| 9.24 | 3.65 | 3.82 | 5.03 | 5.80 | 6.05 |
| 9.25 | 3.63 | 3.77 | 5.09 | 5.85 | 6.07 |
| 9.26 | 3.65 | 3.65 | 5.11 | 5.86 | 6.13 |
| 9.27 | 3.69 | 3.71 | 5.08 | 5.88 | 6.15 |
| 9.28 | 3.69 | 3.90 | 5.03 | 5.95 | 6.13 |
| 9.29 | 3.66 | 3.84 | 5.04 | 6.00 | 6.18 |
| 9.30 | 3.62 | 3.64 | 5.16 | 5.99 | 6.26 |
| 9.31 | 3.62 | 3.64 | 5.26 | 5.98 | 6.25 |
| 9.32 | 3.66 | 3.76 | 5.13 | 5.98 | 6.22 |
| 9.33 | 3.64 | 3.78 | 5.00 | 5.99 | 6.29 |
| 9.34 | 3.57 | 3.73 | 5.04 | 6.00 | 6.35 |
| 9.35 | 3.58 | 3.71 | 5.13 | 6.04 | 6.34 |
| 9.36 | 3.66 | 3.67 | 5.13 | 6.10 | 6.34 |
| 9.37 | 3.63 | 3.67 | 5.12 | 6.11 | 6.38 |
| 9.38 | 3.50 | 3.70 | 5.31 | 6.10 | 6.42 |
| 9.39 | 3.47 | 3.68 | 5.34 | 6.15 | 6.45 |
| 9.40 | 3.59 | 3.66 | 5.05 | 6.20 | 6.49 |
| 9.41 | 3.67 | 3.71 | 5.00 | 6.18 | 6.51 |
| 9.42 | 3.58 | 3.72 | 5.16 | 6.17 | 6.53 |
|  |  |  |  |  |  |
| *t* (s) | Pressure loads (kPa) | | | | |
| *hu* = 0.30 m *hd*= 0.30 m | | | | |
| *h* = 0.10 m | *h* = 0.20 m | *h* = 0.30 m | *h* = 0.40 m | *h* = 0.50 m |
| 9.43 | 3.44 | 3.64 | 5.22 | 6.19 | 6.53 |
| 9.44 | 3.43 | 3.65 | 5.21 | 6.18 | 6.55 |
| 9.45 | 3.55 | 3.73 | 5.28 | 6.18 | 6.58 |
| 9.46 | 3.62 | 3.72 | 5.36 | 6.22 | 6.60 |
| 9.47 | 3.58 | 3.71 | 5.36 | 6.24 | 6.60 |
| 9.48 | 3.47 | 3.77 | 5.29 | 6.25 | 6.61 |
| 9.49 | 3.46 | 3.72 | 5.27 | 6.28 | 6.65 |
| 9.50 | 3.53 | 3.61 | 5.26 | 6.31 | 6.72 |
| 9.51 | 3.58 | 3.70 | 5.27 | 6.32 | 6.70 |
| 9.52 | 3.55 | 3.87 | 5.35 | 6.31 | 6.64 |
| 9.53 | 3.52 | 3.80 | 5.39 | 6.28 | 6.70 |
| 9.54 | 3.54 | 3.65 | 5.40 | 6.30 | 6.80 |
| 9.55 | 3.57 | 3.69 | 5.43 | 6.33 | 6.77 |
| 9.56 | 3.55 | 3.78 | 5.41 | 6.31 | 6.69 |
| 9.57 | 3.51 | 3.81 | 5.41 | 6.31 | 6.73 |
| 9.58 | 3.52 | 3.84 | 5.44 | 6.38 | 6.79 |
| 9.59 | 3.59 | 3.84 | 5.45 | 6.43 | 6.77 |
| 9.60 | 3.61 | 3.77 | 5.46 | 6.41 | 6.75 |
| 9.61 | 3.57 | 3.75 | 5.41 | 6.41 | 6.77 |
| 9.62 | 3.52 | 3.86 | 5.43 | 6.43 | 6.77 |
| 9.63 | 3.55 | 3.94 | 5.53 | 6.43 | 6.77 |
| 9.64 | 3.62 | 3.90 | 5.55 | 6.42 | 6.78 |
| 9.65 | 3.64 | 3.85 | 5.54 | 6.44 | 6.76 |
| 9.66 | 3.62 | 3.86 | 5.54 | 6.43 | 6.77 |
| 9.67 | 3.63 | 3.92 | 5.47 | 6.40 | 6.83 |
| 9.68 | 3.67 | 3.97 | 5.47 | 6.39 | 6.78 |
| 9.69 | 3.66 | 3.99 | 5.50 | 6.44 | 6.69 |
| 9.70 | 3.63 | 3.96 | 5.48 | 6.49 | 6.75 |
| 9.71 | 3.66 | 3.97 | 5.53 | 6.49 | 6.86 |
| 9.72 | 3.74 | 4.03 | 5.61 | 6.47 | 6.82 |
| 9.73 | 3.77 | 4.05 | 5.55 | 6.46 | 6.69 |
| 9.74 | 3.75 | 4.04 | 5.55 | 6.45 | 6.71 |
| 9.75 | 3.75 | 4.06 | 5.61 | 6.44 | 6.86 |
| 9.76 | 3.76 | 4.11 | 5.57 | 6.45 | 6.89 |
| 9.77 | 3.77 | 4.14 | 5.54 | 6.43 | 6.75 |
| 9.78 | 3.83 | 4.16 | 5.59 | 6.40 | 6.68 |
| 9.79 | 3.94 | 4.19 | 5.61 | 6.43 | 6.77 |
| 9.80 | 3.97 | 4.22 | 5.60 | 6.48 | 6.85 |
| 9.81 | 3.90 | 4.22 | 5.63 | 6.44 | 6.77 |
| 9.82 | 3.87 | 4.24 | 5.64 | 6.43 | 6.69 |
|  |  |  |  |  |  |
| *t* (s) | Pressure loads (kPa) | | | | |
| *hu* = 0.30 m *hd*= 0.30 m | | | | |
| *h* = 0.10 m | *h* = 0.20 m | *h* = 0.30 m | *h* = 0.40 m | *h* = 0.50 m |
| 9.83 | 3.97 | 4.29 | 5.61 | 6.50 | 6.75 |
| 9.84 | 4.08 | 4.31 | 5.61 | 6.50 | 6.82 |
| 9.85 | 4.10 | 4.34 | 5.62 | 6.42 | 6.81 |
| 9.86 | 4.07 | 4.37 | 5.61 | 6.42 | 6.78 |
| 9.87 | 4.06 | 4.39 | 5.60 | 6.48 | 6.74 |
| 9.88 | 4.09 | 4.40 | 5.64 | 6.44 | 6.73 |
| 9.89 | 4.12 | 4.43 | 5.70 | 6.40 | 6.76 |
| 9.90 | 4.15 | 4.49 | 5.65 | 6.47 | 6.74 |
| 9.91 | 4.19 | 4.52 | 5.59 | 6.51 | 6.67 |
| 9.92 | 4.25 | 4.51 | 5.70 | 6.42 | 6.66 |
| 9.93 | 4.29 | 4.55 | 5.77 | 6.41 | 6.74 |
| 9.94 | 4.29 | 4.62 | 5.67 | 6.50 | 6.75 |
| 9.95 | 4.27 | 4.67 | 5.63 | 6.46 | 6.69 |
| 9.96 | 4.31 | 4.63 | 5.72 | 6.39 | 6.66 |
| 9.97 | 4.40 | 4.65 | 5.74 | 6.46 | 6.76 |
| 9.98 | 4.47 | 4.73 | 5.71 | 6.52 | 6.80 |
| 9.99 | 4.49 | 4.79 | 5.71 | 6.42 | 6.68 |
| 10.00 | 4.45 | 4.82 | 5.78 | 6.40 | 6.61 |
| 10.01 | 4.43 | 4.84 | 5.88 | 6.50 | 6.68 |
| 10.02 | 4.47 | 4.82 | 5.81 | 6.50 | 6.70 |
| 10.03 | 4.55 | 4.84 | 5.72 | 6.41 | 6.63 |
| 10.04 | 4.62 | 4.92 | 5.83 | 6.43 | 6.59 |
| 10.05 | 4.66 | 4.99 | 5.88 | 6.46 | 6.61 |
| 10.06 | 4.66 | 5.01 | 5.76 | 6.43 | 6.65 |
| 10.07 | 4.63 | 5.04 | 5.75 | 6.43 | 6.64 |
| 10.08 | 4.63 | 5.07 | 5.83 | 6.48 | 6.56 |
| 10.09 | 4.69 | 5.07 | 5.80 | 6.48 | 6.53 |
| 10.10 | 4.77 | 5.10 | 5.76 | 6.51 | 6.57 |
| 10.11 | 4.84 | 5.15 | 5.77 | 6.54 | 6.58 |
| 10.12 | 4.89 | 5.19 | 5.80 | 6.45 | 6.56 |
| 10.13 | 4.95 | 5.21 | 5.79 | 6.37 | 6.58 |
| 10.14 | 4.95 | 5.22 | 5.80 | 6.39 | 6.58 |
| 10.15 | 5.05 | 5.25 | 5.81 | 6.42 | 6.54 |
| 10.16 | 5.27 | 5.27 | 5.79 | 6.44 | 6.50 |
| 10.17 | 5.21 | 5.26 | 5.75 | 6.46 | 6.48 |
| 10.18 | 5.00 | 5.34 | 5.77 | 6.45 | 6.48 |
| 10.19 | 5.00 | 5.62 | 5.84 | 6.40 | 6.48 |
| 10.20 | 5.03 | 5.59 | 5.84 | 6.36 | 6.53 |
| 10.21 | 4.94 | 5.37 | 5.80 | 6.37 | 6.57 |
| 10.22 | 4.95 | 5.46 | 5.84 | 6.37 | 6.49 |
|  |  |  |  |  |  |
| *t* (s) | Pressure loads (kPa) | | | | |
| *hu* = 0.30 m *hd*= 0.30 m | | | | |
| *h* = 0.10 m | *h* = 0.20 m | *h* = 0.30 m | *h* = 0.40 m | *h* = 0.50 m |
| 10.23 | 5.10 | 5.66 | 5.87 | 6.32 | 6.46 |
| 10.24 | 5.22 | 5.67 | 5.79 | 6.27 | 6.56 |
| 10.25 | 5.24 | 5.33 | 5.77 | 6.32 | 6.59 |
| 10.26 | 5.17 | 5.38 | 5.87 | 6.36 | 6.50 |
| 10.27 | 5.13 | 5.68 | 5.86 | 6.33 | 6.46 |
| 10.28 | 5.17 | 5.56 | 5.78 | 6.30 | 6.45 |
| 10.29 | 5.20 | 5.44 | 5.82 | 6.34 | 6.44 |
| 10.30 | 5.21 | 5.61 | 5.91 | 6.32 | 6.50 |
| 10.31 | 5.29 | 5.61 | 5.84 | 6.22 | 6.56 |
| 10.32 | 5.39 | 5.52 | 5.76 | 6.21 | 6.56 |
| 10.33 | 5.48 | 5.61 | 5.83 | 6.27 | 6.53 |
| 10.34 | 5.42 | 5.61 | 5.84 | 6.28 | 6.54 |
| 10.35 | 5.35 | 5.57 | 5.71 | 6.27 | 6.58 |
| 10.36 | 5.45 | 5.57 | 5.72 | 6.25 | 6.56 |
| 10.37 | 5.51 | 5.58 | 5.90 | 6.24 | 6.47 |
| 10.38 | 5.43 | 5.66 | 5.95 | 6.30 | 6.44 |
| 10.39 | 5.41 | 5.64 | 5.81 | 6.32 | 6.52 |
| 10.40 | 5.52 | 5.60 | 5.73 | 6.17 | 6.61 |
| 10.41 | 5.58 | 5.71 | 5.83 | 6.11 | 6.62 |
| 10.42 | 5.55 | 5.75 | 5.85 | 6.24 | 6.58 |
| 10.43 | 5.57 | 5.64 | 5.76 | 6.29 | 6.60 |
| 10.44 | 5.67 | 5.67 | 5.77 | 6.17 | 6.68 |
| 10.45 | 5.69 | 5.80 | 5.82 | 6.13 | 6.69 |
| 10.46 | 5.62 | 5.79 | 5.79 | 6.19 | 6.58 |
| 10.47 | 5.62 | 5.72 | 5.77 | 6.27 | 6.55 |
| 10.48 | 5.66 | 5.79 | 5.79 | 6.24 | 6.62 |
| 10.49 | 5.66 | 5.94 | 5.85 | 6.06 | 6.66 |
| 10.50 | 5.62 | 5.92 | 5.84 | 6.05 | 6.65 |
| 10.51 | 5.63 | 5.83 | 5.75 | 6.25 | 6.66 |
| 10.52 | 5.63 | 5.95 | 5.78 | 6.31 | 6.69 |
| 10.53 | 5.62 | 6.05 | 5.83 | 6.14 | 6.71 |
| 10.54 | 5.62 | 5.92 | 5.77 | 6.07 | 6.75 |
| 10.55 | 5.62 | 5.86 | 5.76 | 6.14 | 6.74 |
| 10.56 | 5.62 | 5.98 | 5.81 | 6.15 | 6.67 |
| 10.57 | 5.63 | 5.95 | 5.79 | 6.09 | 6.61 |
| 10.58 | 5.63 | 5.84 | 5.78 | 6.08 | 6.68 |
| 10.59 | 5.62 | 5.93 | 5.77 | 6.12 | 6.74 |
| 10.60 | 5.64 | 6.00 | 5.76 | 6.17 | 6.68 |
| 10.61 | 5.63 | 5.93 | 5.75 | 6.22 | 6.64 |
| 10.62 | 5.61 | 5.91 | 5.73 | 6.18 | 6.72 |
|  |  |  |  |  |  |
| *t* (s) | Pressure loads (kPa) | | | | |
| *hu* = 0.30 m *hd*= 0.30 m | | | | |
| *h* = 0.10 m | *h* = 0.20 m | *h* = 0.30 m | *h* = 0.40 m | *h* = 0.50 m |
| 10.63 | 5.61 | 5.93 | 5.69 | 6.06 | 6.79 |
| 10.64 | 5.61 | 5.87 | 5.72 | 6.03 | 6.76 |
| 10.65 | 5.63 | 5.86 | 5.75 | 6.08 | 6.74 |
| 10.66 | 5.66 | 5.87 | 5.71 | 6.09 | 6.73 |
| 10.67 | 5.71 | 5.84 | 5.66 | 6.07 | 6.72 |
| 10.68 | 5.74 | 5.88 | 5.70 | 6.08 | 6.71 |
| 10.69 | 5.76 | 5.89 | 5.76 | 6.11 | 6.67 |
| 10.70 | 5.72 | 5.83 | 5.72 | 6.13 | 6.64 |
| 10.71 | 5.63 | 5.84 | 5.67 | 6.13 | 6.72 |
| 10.72 | 5.65 | 5.84 | 5.73 | 6.10 | 6.76 |
| 10.73 | 5.76 | 5.76 | 5.74 | 6.07 | 6.69 |
| 10.74 | 5.72 | 5.78 | 5.66 | 6.04 | 6.68 |
| 10.75 | 5.63 | 5.86 | 5.64 | 6.04 | 6.77 |
| 10.76 | 5.67 | 5.79 | 5.67 | 6.06 | 6.75 |
| 10.77 | 5.73 | 5.78 | 5.66 | 6.05 | 6.65 |
| 10.78 | 5.74 | 5.92 | 5.66 | 6.04 | 6.66 |
| 10.79 | 5.63 | 5.87 | 5.71 | 6.09 | 6.70 |
| 10.80 | 5.54 | 5.75 | 5.69 | 6.08 | 6.69 |
| 10.81 | 5.61 | 5.85 | 5.62 | 6.03 | 6.64 |
| 10.82 | 5.68 | 5.91 | 5.67 | 6.04 | 6.64 |
| 10.83 | 5.59 | 5.81 | 5.74 | 6.08 | 6.66 |
| 10.84 | 5.56 | 5.83 | 5.65 | 6.05 | 6.66 |
| 10.85 | 5.64 | 5.90 | 5.53 | 5.98 | 6.67 |
| 10.86 | 5.65 | 5.85 | 5.59 | 6.00 | 6.70 |
| 10.87 | 5.53 | 5.84 | 5.68 | 6.09 | 6.69 |
| 10.88 | 5.42 | 5.90 | 5.63 | 6.07 | 6.64 |
| 10.89 | 5.46 | 5.94 | 5.56 | 6.02 | 6.62 |
| 10.90 | 5.49 | 5.93 | 5.61 | 6.06 | 6.63 |
| 10.91 | 5.46 | 5.92 | 5.66 | 6.08 | 6.63 |
| 10.92 | 5.45 | 5.96 | 5.59 | 6.04 | 6.59 |
| 10.93 | 5.41 | 5.89 | 5.53 | 6.01 | 6.56 |
| 10.94 | 5.35 | 5.84 | 5.56 | 6.04 | 6.60 |
| 10.95 | 5.34 | 5.86 | 5.58 | 6.06 | 6.62 |
| 10.96 | 5.34 | 5.88 | 5.55 | 6.04 | 6.59 |
| 10.97 | 5.35 | 5.94 | 5.57 | 6.01 | 6.53 |
| 10.98 | 5.38 | 6.02 | 5.61 | 6.01 | 6.52 |
| 10.99 | 5.29 | 5.91 | 5.59 | 6.04 | 6.61 |
| 11.00 | 5.19 | 5.92 | 5.56 | 6.05 | 6.66 |
| 11.01 | 5.19 | 6.07 | 5.61 | 6.03 | 6.53 |
| 11.02 | 5.17 | 5.96 | 5.62 | 6.01 | 6.41 |
|  |  |  |  |  |  |
| *t* (s) | Pressure loads (kPa) | | | | |
| *hu* = 0.30 m *hd*= 0.30 m | | | | |
| *h* = 0.10 m | *h* = 0.20 m | *h* = 0.30 m | *h* = 0.40 m | *h* = 0.50 m |
| 11.03 | 5.13 | 5.81 | 5.50 | 6.04 | 6.53 |
| 11.04 | 5.24 | 5.93 | 5.50 | 6.07 | 6.65 |
| 11.05 | 5.34 | 5.98 | 5.63 | 6.02 | 6.51 |
| 11.06 | 5.19 | 5.82 | 5.62 | 5.97 | 6.38 |
| 11.07 | 4.99 | 5.78 | 5.53 | 6.01 | 6.53 |
| 11.08 | 4.99 | 5.89 | 5.57 | 6.05 | 6.64 |
| 11.09 | 5.00 | 5.89 | 5.61 | 6.01 | 6.47 |
| 11.10 | 4.97 | 5.77 | 5.58 | 5.97 | 6.35 |
| 11.11 | 5.00 | 5.73 | 5.53 | 6.01 | 6.50 |
| 11.12 | 5.08 | 5.82 | 5.55 | 6.05 | 6.62 |
| 11.13 | 5.10 | 5.71 | 5.59 | 6.01 | 6.47 |
| 11.14 | 5.06 | 5.64 | 5.59 | 5.98 | 6.38 |
| 11.15 | 5.00 | 5.73 | 5.58 | 6.01 | 6.46 |
| 11.16 | 4.88 | 5.67 | 5.58 | 6.03 | 6.49 |
| 11.17 | 4.84 | 5.61 | 5.60 | 6.00 | 6.43 |
| 11.18 | 5.04 | 5.74 | 5.62 | 6.02 | 6.38 |
| 11.19 | 5.13 | 5.69 | 5.57 | 6.05 | 6.40 |
| 11.20 | 5.00 | 5.59 | 5.55 | 6.02 | 6.44 |
| 11.21 | 4.91 | 5.68 | 5.62 | 6.01 | 6.43 |
| 11.22 | 4.86 | 5.65 | 5.61 | 5.96 | 6.38 |
| 11.23 | 4.79 | 5.56 | 5.52 | 5.99 | 6.38 |
| 11.24 | 4.85 | 5.58 | 5.58 | 6.11 | 6.40 |
| 11.25 | 4.96 | 5.60 | 5.65 | 6.11 | 6.38 |
| 11.26 | 4.92 | 5.61 | 5.62 | 6.03 | 6.33 |
| 11.27 | 4.91 | 5.62 | 5.59 | 6.05 | 6.34 |
| 11.28 | 4.88 | 5.59 | 5.59 | 6.12 | 6.35 |
| 11.29 | 4.78 | 5.63 | 5.60 | 6.12 | 6.35 |
| 11.30 | 4.72 | 5.61 | 5.62 | 6.04 | 6.33 |
| 11.31 | 4.76 | 5.51 | 5.59 | 6.01 | 6.31 |
| 11.32 | 4.85 | 5.53 | 5.58 | 6.07 | 6.31 |
| 11.33 | 4.86 | 5.58 | 5.61 | 6.11 | 6.32 |
| 11.34 | 4.81 | 5.55 | 5.65 | 6.11 | 6.32 |
| 11.35 | 4.73 | 5.55 | 5.64 | 6.10 | 6.32 |
| 11.36 | 4.71 | 5.59 | 5.60 | 6.11 | 6.30 |
| 11.37 | 4.78 | 5.54 | 5.63 | 6.14 | 6.29 |
| 11.38 | 4.78 | 5.45 | 5.68 | 6.17 | 6.29 |
| 11.39 | 4.72 | 5.45 | 5.66 | 6.15 | 6.29 |
| 11.40 | 4.68 | 5.51 | 5.59 | 6.12 | 6.25 |
| 11.41 | 4.68 | 5.47 | 5.60 | 6.14 | 6.26 |
| 11.42 | 4.71 | 5.39 | 5.67 | 6.16 | 6.31 |
|  |  |  |  |  |  |
| *t* (s) | Pressure loads (kPa) | | | | |
| *hu* = 0.30 m *hd*= 0.30 m | | | | |
| *h* = 0.10 m | *h* = 0.20 m | *h* = 0.30 m | *h* = 0.40 m | *h* = 0.50 m |
| 11.43 | 4.69 | 5.42 | 5.68 | 6.16 | 6.33 |
| 11.44 | 4.68 | 5.40 | 5.63 | 6.18 | 6.29 |
| 11.45 | 4.74 | 5.33 | 5.67 | 6.20 | 6.26 |
| 11.46 | 4.73 | 5.32 | 5.73 | 6.22 | 6.29 |
| 11.47 | 4.63 | 5.34 | 5.68 | 6.22 | 6.32 |
| 11.48 | 4.53 | 5.30 | 5.61 | 6.26 | 6.29 |
| 11.49 | 4.58 | 5.22 | 5.62 | 6.31 | 6.28 |
| 11.50 | 4.68 | 5.20 | 5.67 | 6.31 | 6.31 |
| 11.51 | 4.70 | 5.21 | 5.67 | 6.29 | 6.29 |
| 11.52 | 4.69 | 5.20 | 5.68 | 6.35 | 6.31 |
| 11.53 | 4.67 | 5.21 | 5.72 | 6.41 | 6.37 |
| 11.54 | 4.65 | 5.25 | 5.75 | 6.36 | 6.37 |
| 11.55 | 4.62 | 5.21 | 5.71 | 6.31 | 6.33 |
| 11.56 | 4.59 | 5.12 | 5.72 | 6.41 | 6.35 |
| 11.57 | 4.59 | 5.08 | 5.74 | 6.53 | 6.41 |
| 11.58 | 4.65 | 5.08 | 5.72 | 6.49 | 6.40 |
| 11.59 | 4.70 | 5.07 | 5.68 | 6.41 | 6.33 |
| 11.60 | 4.69 | 5.10 | 5.71 | 6.44 | 6.35 |
| 11.61 | 4.63 | 5.14 | 5.75 | 6.61 | 6.48 |
| 11.62 | 4.58 | 5.10 | 5.76 | 6.67 | 6.52 |
| 11.63 | 4.65 | 4.96 | 5.77 | 6.54 | 6.45 |
| 11.64 | 4.67 | 5.01 | 5.77 | 6.48 | 6.50 |
| 11.65 | 4.65 | 4.97 | 5.78 | 6.58 | 6.53 |
| 11.66 | 4.62 | 4.97 | 5.76 | 6.59 | 6.50 |
| 11.67 | 4.57 | 4.94 | 5.74 | 6.49 | 6.49 |
| 11.68 | 4.59 | 4.88 | 5.79 | 6.52 | 6.55 |
| 11.69 | 4.65 | 4.88 | 5.83 | 6.67 | 6.59 |
| 11.70 | 4.69 | 4.90 | 5.78 | 6.69 | 6.59 |
| 11.71 | 4.68 | 4.89 | 5.77 | 6.62 | 6.58 |
| 11.72 | 4.62 | 4.82 | 5.83 | 6.59 | 6.61 |
| 11.73 | 4.60 | 4.79 | 5.84 | 6.62 | 6.62 |
| 11.74 | 4.63 | 4.80 | 5.80 | 6.65 | 6.63 |
| 11.75 | 4.67 | 4.80 | 5.81 | 6.62 | 6.61 |
| 11.76 | 4.67 | 4.80 | 5.84 | 6.59 | 6.62 |
| 11.77 | 4.68 | 4.80 | 5.84 | 6.62 | 6.67 |
| 11.78 | 4.70 | 4.78 | 5.82 | 6.65 | 6.70 |
| 11.79 | 4.69 | 4.75 | 5.85 | 6.70 | 6.68 |
| 11.80 | 4.64 | 4.78 | 5.91 | 6.75 | 6.69 |
| 11.81 | 4.61 | 4.81 | 5.87 | 6.71 | 6.71 |
| 11.82 | 4.63 | 4.77 | 5.82 | 6.68 | 6.68 |
|  |  |  |  |  |  |
| *t* (s) | Pressure loads (kPa) | | | | |
| *hu* = 0.30 m *hd*= 0.30 m | | | | |
| *h* = 0.10 m | *h* = 0.20 m | *h* = 0.30 m | *h* = 0.40 m | *h* = 0.50 m |
| 11.83 | 4.67 | 4.74 | 5.91 | 6.75 | 6.68 |
| 11.84 | 4.70 | 4.74 | 5.95 | 6.76 | 6.68 |
| 11.85 | 4.72 | 4.74 | 5.85 | 6.69 | 6.67 |
| 11.86 | 4.73 | 4.73 | 5.85 | 6.69 | 6.71 |
| 11.87 | 4.73 | 4.73 | 5.93 | 6.74 | 6.75 |
| 11.88 | 4.71 | 4.79 | 5.95 | 6.74 | 6.73 |
| 11.89 | 4.68 | 4.81 | 5.91 | 6.74 | 6.71 |
| 11.90 | 4.69 | 4.77 | 5.90 | 6.73 | 6.74 |
| 11.91 | 4.74 | 4.76 | 5.97 | 6.76 | 6.74 |
| 11.92 | 4.78 | 4.77 | 5.98 | 6.77 | 6.69 |
| 11.93 | 4.75 | 4.80 | 5.90 | 6.74 | 6.67 |
| 11.94 | 4.71 | 4.83 | 5.91 | 6.73 | 6.70 |
| 11.95 | 4.70 | 4.89 | 5.98 | 6.75 | 6.72 |
| 11.96 | 4.71 | 4.88 | 5.96 | 6.71 | 6.71 |
| 11.97 | 4.72 | 4.82 | 5.91 | 6.71 | 6.70 |
| 11.98 | 4.71 | 4.81 | 5.94 | 6.77 | 6.71 |
| 11.99 | 4.72 | 4.83 | 5.97 | 6.76 | 6.73 |
| 12.00 | 4.74 | 4.85 | 5.95 | 6.74 | 6.77 |
| 12.01 | 4.75 | 4.90 | 5.94 | 6.75 | 6.79 |
| 12.02 | 4.75 | 4.97 | 5.97 | 6.77 | 6.71 |
| 12.03 | 4.73 | 4.96 | 5.97 | 6.79 | 6.65 |
| 12.04 | 4.74 | 4.91 | 5.92 | 6.78 | 6.71 |
| 12.05 | 4.77 | 4.90 | 5.93 | 6.72 | 6.72 |
| 12.06 | 4.77 | 4.91 | 5.99 | 6.75 | 6.67 |
| 12.07 | 4.77 | 4.95 | 5.96 | 6.78 | 6.67 |
| 12.08 | 4.77 | 5.01 | 5.94 | 6.77 | 6.73 |
| 12.09 | 4.81 | 5.04 | 5.99 | 6.74 | 6.78 |
| 12.10 | 4.84 | 5.02 | 6.01 | 6.74 | 6.76 |
| 12.11 | 4.84 | 4.98 | 5.97 | 6.78 | 6.70 |
| 12.12 | 4.81 | 5.00 | 5.95 | 6.85 | 6.73 |
| 12.13 | 4.78 | 5.04 | 5.98 | 6.82 | 6.81 |
| 12.14 | 4.82 | 5.07 | 5.96 | 6.73 | 6.75 |
| 12.15 | 4.85 | 5.11 | 5.93 | 6.74 | 6.64 |
| 12.16 | 4.87 | 5.14 | 5.96 | 6.80 | 6.70 |
| 12.17 | 4.89 | 5.12 | 6.01 | 6.78 | 6.77 |
| 12.18 | 4.87 | 5.09 | 5.99 | 6.72 | 6.71 |
| 12.19 | 4.83 | 5.09 | 5.97 | 6.74 | 6.70 |
| 12.20 | 4.84 | 5.20 | 6.01 | 6.79 | 6.80 |
| 12.21 | 4.89 | 5.37 | 6.01 | 6.81 | 6.82 |
| 12.22 | 4.93 | 5.18 | 5.96 | 6.80 | 6.73 |
|  |  |  |  |  |  |
| *t* (s) | Pressure loads (kPa) | | | | |
| *hu* = 0.30 m *hd*= 0.30 m | | | | |
| *h* = 0.10 m | *h* = 0.20 m | *h* = 0.30 m | *h* = 0.40 m | *h* = 0.50 m |
| 12.23 | 4.94 | 4.98 | 5.97 | 6.76 | 6.72 |
| 12.24 | 4.94 | 5.13 | 6.03 | 6.78 | 6.75 |
| 12.25 | 4.93 | 5.23 | 6.00 | 6.85 | 6.74 |
| 12.26 | 4.91 | 5.19 | 5.95 | 6.80 | 6.71 |
| 12.27 | 4.93 | 5.20 | 5.99 | 6.68 | 6.72 |
| 12.28 | 4.96 | 5.31 | 6.02 | 6.71 | 6.74 |
| 12.29 | 4.99 | 5.37 | 5.97 | 6.83 | 6.77 |
| 12.30 | 5.01 | 5.26 | 5.99 | 6.81 | 6.74 |
| 12.31 | 5.00 | 5.24 | 6.04 | 6.72 | 6.74 |
| 12.32 | 4.99 | 5.37 | 5.98 | 6.73 | 6.75 |
| 12.33 | 5.00 | 5.34 | 5.94 | 6.82 | 6.76 |
| 12.34 | 5.03 | 5.26 | 5.99 | 6.85 | 6.78 |
| 12.35 | 5.03 | 5.43 | 6.02 | 6.81 | 6.78 |
| 12.36 | 5.03 | 5.59 | 6.00 | 6.78 | 6.72 |
| 12.37 | 5.04 | 5.41 | 5.99 | 6.77 | 6.69 |
| 12.38 | 5.08 | 5.30 | 6.02 | 6.79 | 6.78 |
| 12.39 | 5.10 | 5.43 | 6.05 | 6.84 | 6.85 |
| 12.40 | 5.11 | 5.46 | 6.04 | 6.82 | 6.81 |
| 12.41 | 5.15 | 5.42 | 5.98 | 6.73 | 6.77 |
| 12.42 | 5.19 | 5.44 | 6.00 | 6.73 | 6.81 |
| 12.43 | 5.20 | 5.58 | 6.09 | 6.84 | 6.87 |
| 12.44 | 5.20 | 5.65 | 6.09 | 6.88 | 6.85 |
| 12.45 | 5.19 | 5.53 | 6.03 | 6.79 | 6.83 |
| 12.46 | 5.21 | 5.51 | 6.05 | 6.79 | 6.88 |
| 12.47 | 5.26 | 5.63 | 6.12 | 6.88 | 6.92 |
| 12.48 | 5.27 | 5.58 | 6.11 | 6.90 | 6.88 |
| 12.49 | 5.30 | 5.51 | 6.07 | 6.82 | 6.88 |
| 12.50 | 5.44 | 5.62 | 6.09 | 6.78 | 6.96 |
| 12.51 | 5.43 | 5.73 | 6.10 | 6.85 | 7.01 |
| 12.52 | 5.22 | 5.68 | 6.08 | 6.89 | 6.96 |
| 12.53 | 5.13 | 5.65 | 6.08 | 6.84 | 6.93 |
| 12.54 | 5.22 | 5.72 | 6.13 | 6.83 | 7.03 |
| 12.55 | 5.32 | 5.75 | 6.12 | 6.90 | 7.10 |
| 12.56 | 5.33 | 5.66 | 6.11 | 6.93 | 7.06 |
| 12.57 | 5.36 | 5.66 | 6.16 | 6.90 | 6.96 |
| 12.58 | 5.46 | 5.76 | 6.16 | 6.90 | 6.97 |
| 12.59 | 5.49 | 5.77 | 6.09 | 6.92 | 7.09 |
| 12.60 | 5.41 | 5.72 | 6.10 | 6.88 | 7.13 |
| 12.61 | 5.37 | 5.80 | 6.22 | 6.85 | 7.03 |
| 12.62 | 5.38 | 5.87 | 6.24 | 6.91 | 6.98 |
|  |  |  |  |  |  |
| *t* (s) | Pressure loads (kPa) | | | | |
| *hu* = 0.30 m *hd*= 0.30 m | | | | |
| *h* = 0.10 m | *h* = 0.20 m | *h* = 0.30 m | *h* = 0.40 m | *h* = 0.50 m |
| 12.63 | 5.40 | 5.80 | 6.15 | 6.94 | 7.06 |
| 12.64 | 5.44 | 5.81 | 6.18 | 6.89 | 7.12 |
| 12.65 | 5.49 | 5.92 | 6.26 | 6.88 | 7.08 |
| 12.66 | 5.55 | 5.87 | 6.24 | 6.92 | 7.04 |
| 12.67 | 5.62 | 5.81 | 6.22 | 6.92 | 7.02 |
| 12.68 | 5.61 | 5.91 | 6.29 | 6.89 | 7.01 |
| 12.69 | 5.53 | 5.98 | 6.31 | 6.90 | 7.03 |
| 12.70 | 5.52 | 5.93 | 6.27 | 6.88 | 7.07 |
| 12.71 | 5.53 | 5.92 | 6.29 | 6.87 | 7.04 |
| 12.72 | 5.52 | 6.02 | 6.36 | 6.89 | 6.96 |
| 12.73 | 5.54 | 6.03 | 6.40 | 6.87 | 6.95 |
| 12.74 | 5.59 | 5.96 | 6.38 | 6.81 | 7.03 |
| 12.75 | 5.64 | 5.99 | 6.37 | 6.82 | 7.02 |
| 12.76 | 5.65 | 6.07 | 6.41 | 6.88 | 6.91 |
| 12.77 | 5.66 | 6.03 | 6.44 | 6.87 | 6.91 |
| 12.78 | 5.65 | 6.00 | 6.39 | 6.77 | 6.98 |
| 12.79 | 5.63 | 6.05 | 6.37 | 6.76 | 7.00 |
| 12.80 | 5.61 | 6.08 | 6.45 | 6.85 | 6.95 |
| 12.81 | 5.63 | 6.05 | 6.48 | 6.86 | 6.88 |
| 12.82 | 5.66 | 6.06 | 6.42 | 6.77 | 6.89 |
| 12.83 | 5.68 | 6.11 | 6.45 | 6.74 | 6.94 |
| 12.84 | 5.72 | 6.10 | 6.53 | 6.78 | 6.94 |
| 12.85 | 5.78 | 6.09 | 6.55 | 6.80 | 6.89 |
| 12.86 | 5.80 | 6.10 | 6.48 | 6.75 | 6.87 |
| 12.87 | 5.75 | 6.13 | 6.47 | 6.70 | 6.89 |
| 12.88 | 5.73 | 6.13 | 6.54 | 6.73 | 6.90 |
| 12.89 | 5.76 | 6.15 | 6.55 | 6.77 | 6.89 |
| 12.90 | 5.75 | 6.16 | 6.48 | 6.74 | 6.89 |
| 12.91 | 5.72 | 6.16 | 6.52 | 6.70 | 6.88 |
| 12.92 | 5.75 | 6.18 | 6.61 | 6.72 | 6.84 |
| 12.93 | 5.79 | 6.21 | 6.58 | 6.72 | 6.83 |
| 12.94 | 5.78 | 6.22 | 6.52 | 6.67 | 6.86 |
| 12.95 | 5.81 | 6.21 | 6.56 | 6.66 | 6.85 |
| 12.96 | 5.85 | 6.23 | 6.60 | 6.66 | 6.81 |
| 12.97 | 5.83 | 6.25 | 6.55 | 6.64 | 6.81 |
| 12.98 | 5.79 | 6.25 | 6.54 | 6.67 | 6.89 |
| 12.99 | 5.81 | 6.26 | 6.55 | 6.69 | 6.89 |
| 13.00 | 5.81 | 6.29 | 6.53 | 6.64 | 6.79 |
| 13.01 | 5.79 | 6.28 | 6.50 | 6.61 | 6.76 |
| 13.02 | 5.81 | 6.26 | 6.51 | 6.65 | 6.85 |
|  |  |  |  |  |  |
| *t* (s) | Pressure loads (kPa) | | | | |
| *hu* = 0.30 m *hd*= 0.30 m | | | | |
| *h* = 0.10 m | *h* = 0.20 m | *h* = 0.30 m | *h* = 0.40 m | *h* = 0.50 m |
| 13.03 | 5.87 | 6.27 | 6.55 | 6.67 | 6.87 |
| 13.04 | 5.90 | 6.30 | 6.54 | 6.60 | 6.78 |
| 13.05 | 5.87 | 6.29 | 6.52 | 6.54 | 6.78 |
| 13.06 | 5.86 | 6.27 | 6.53 | 6.60 | 6.86 |
| 13.07 | 5.88 | 6.30 | 6.55 | 6.65 | 6.87 |
| 13.08 | 5.88 | 6.32 | 6.52 | 6.57 | 6.83 |
| 13.09 | 5.86 | 6.28 | 6.46 | 6.51 | 6.86 |
| 13.10 | 5.85 | 6.27 | 6.46 | 6.60 | 6.83 |
| 13.11 | 5.86 | 6.33 | 6.47 | 6.66 | 6.77 |
| 13.12 | 5.87 | 6.31 | 6.45 | 6.57 | 6.80 |
| 13.13 | 5.89 | 6.26 | 6.46 | 6.52 | 6.89 |
| 13.14 | 5.88 | 6.28 | 6.49 | 6.58 | 6.86 |
| 13.15 | 5.87 | 6.29 | 6.50 | 6.56 | 6.80 |
| 13.16 | 5.89 | 6.28 | 6.49 | 6.49 | 6.84 |
| 13.17 | 5.93 | 6.30 | 6.48 | 6.49 | 6.89 |
| 13.18 | 5.94 | 6.33 | 6.50 | 6.49 | 6.88 |
| 13.19 | 5.90 | 6.31 | 6.48 | 6.48 | 6.85 |
| 13.20 | 5.91 | 6.29 | 6.41 | 6.53 | 6.86 |
| 13.21 | 5.95 | 6.32 | 6.40 | 6.53 | 6.88 |
| 13.22 | 5.97 | 6.33 | 6.43 | 6.50 | 6.87 |
| 13.23 | 5.96 | 6.29 | 6.43 | 6.50 | 6.88 |
| 13.24 | 5.98 | 6.29 | 6.42 | 6.49 | 6.92 |
| 13.25 | 6.01 | 6.35 | 6.44 | 6.48 | 6.91 |
| 13.26 | 6.03 | 6.33 | 6.46 | 6.45 | 6.87 |
| 13.27 | 6.01 | 6.26 | 6.44 | 6.39 | 6.88 |
| 13.28 | 6.02 | 6.32 | 6.44 | 6.38 | 6.94 |
| 13.29 | 6.05 | 6.40 | 6.45 | 6.46 | 6.94 |
| 13.30 | 6.03 | 6.33 | 6.42 | 6.47 | 6.91 |
| 13.31 | 6.01 | 6.28 | 6.37 | 6.40 | 6.91 |
| 13.32 | 6.01 | 6.37 | 6.34 | 6.41 | 6.94 |
| 13.33 | 6.02 | 6.37 | 6.36 | 6.51 | 6.95 |
| 13.34 | 5.99 | 6.29 | 6.35 | 6.51 | 6.95 |
| 13.35 | 5.95 | 6.34 | 6.31 | 6.38 | 6.97 |
| 13.36 | 5.96 | 6.37 | 6.36 | 6.35 | 6.96 |
| 13.37 | 5.98 | 6.32 | 6.41 | 6.41 | 6.92 |
| 13.38 | 5.94 | 6.32 | 6.34 | 6.39 | 6.94 |
| 13.39 | 5.91 | 6.36 | 6.31 | 6.37 | 7.02 |
| 13.40 | 5.93 | 6.35 | 6.37 | 6.40 | 7.03 |
| 13.41 | 5.92 | 6.33 | 6.32 | 6.43 | 7.02 |
| 13.42 | 5.90 | 6.35 | 6.24 | 6.44 | 7.06 |
|  |  |  |  |  |  |
| *t* (s) | Pressure loads (kPa) | | | | |
| *hu* = 0.30 m *hd*= 0.30 m | | | | |
| *h* = 0.10 m | *h* = 0.20 m | *h* = 0.30 m | *h* = 0.40 m | *h* = 0.50 m |
| 13.43 | 5.90 | 6.32 | 6.26 | 6.43 | 7.04 |
| 13.44 | 5.90 | 6.28 | 6.26 | 6.38 | 6.96 |
| 13.45 | 5.88 | 6.28 | 6.22 | 6.36 | 6.98 |
| 13.46 | 5.87 | 6.29 | 6.24 | 6.40 | 7.06 |
| 13.47 | 5.86 | 6.28 | 6.28 | 6.42 | 7.02 |
| 13.48 | 5.84 | 6.27 | 6.28 | 6.37 | 6.96 |
| 13.49 | 5.82 | 6.28 | 6.22 | 6.36 | 7.04 |
| 13.50 | 5.84 | 6.29 | 6.17 | 6.40 | 7.14 |
| 13.51 | 5.83 | 6.32 | 6.20 | 6.41 | 7.09 |
| 13.52 | 5.81 | 6.31 | 6.23 | 6.37 | 7.00 |
| 13.53 | 5.80 | 6.27 | 6.19 | 6.39 | 7.03 |
| 13.54 | 5.79 | 6.29 | 6.14 | 6.43 | 7.10 |
| 13.55 | 5.77 | 6.32 | 6.15 | 6.43 | 7.09 |
| 13.56 | 5.75 | 6.27 | 6.21 | 6.37 | 7.01 |
| 13.57 | 5.75 | 6.24 | 6.24 | 6.34 | 6.98 |
| 13.58 | 5.79 | 6.31 | 6.20 | 6.37 | 7.04 |
| 13.59 | 5.78 | 6.35 | 6.17 | 6.42 | 7.10 |
| 13.60 | 5.71 | 6.33 | 6.18 | 6.41 | 7.12 |
| 13.61 | 5.70 | 6.31 | 6.17 | 6.37 | 7.09 |
| 13.62 | 5.72 | 6.31 | 6.15 | 6.38 | 7.03 |
| 13.63 | 5.71 | 6.32 | 6.14 | 6.43 | 7.04 |
| 13.64 | 5.69 | 6.30 | 6.14 | 6.42 | 7.09 |
| 13.65 | 5.71 | 6.28 | 6.19 | 6.36 | 7.08 |
| 13.66 | 5.71 | 6.30 | 6.24 | 6.37 | 7.02 |
| 13.67 | 5.69 | 6.32 | 6.21 | 6.43 | 6.99 |
| 13.68 | 5.67 | 6.30 | 6.18 | 6.46 | 7.04 |
| 13.69 | 5.67 | 6.27 | 6.19 | 6.45 | 7.11 |
| 13.70 | 5.66 | 6.26 | 6.21 | 6.44 | 7.06 |
| 13.71 | 5.60 | 6.30 | 6.19 | 6.42 | 6.99 |
| 13.72 | 5.62 | 6.29 | 6.17 | 6.45 | 7.05 |
| 13.73 | 5.64 | 6.21 | 6.19 | 6.49 | 7.12 |
| 13.74 | 5.57 | 6.22 | 6.26 | 6.48 | 7.07 |
| 13.75 | 5.50 | 6.27 | 6.29 | 6.43 | 7.02 |
| 13.76 | 5.57 | 6.24 | 6.26 | 6.43 | 7.02 |
| 13.77 | 5.60 | 6.18 | 6.24 | 6.52 | 6.99 |
| 13.78 | 5.52 | 6.22 | 6.25 | 6.57 | 6.97 |
| 13.79 | 5.49 | 6.26 | 6.26 | 6.50 | 7.04 |
| 13.80 | 5.53 | 6.20 | 6.26 | 6.46 | 7.04 |
| 13.81 | 5.56 | 6.12 | 6.26 | 6.58 | 6.98 |
| 13.82 | 5.53 | 6.19 | 6.28 | 6.65 | 7.00 |
|  |  |  |  |  |  |
| *t* (s) | Pressure loads (kPa) | | | | |
| *hu* = 0.30 m *hd*= 0.30 m | | | | |
| *h* = 0.10 m | *h* = 0.20 m | *h* = 0.30 m | *h* = 0.40 m | *h* = 0.50 m |
| 13.83 | 5.50 | 6.23 | 6.31 | 6.52 | 7.12 |
| 13.84 | 5.50 | 6.15 | 6.32 | 6.46 | 7.15 |
| 13.85 | 5.56 | 6.10 | 6.29 | 6.59 | 7.02 |
| 13.86 | 5.57 | 6.20 | 6.29 | 6.66 | 6.95 |
| 13.87 | 5.54 | 6.25 | 6.34 | 6.62 | 7.02 |
| 13.88 | 5.55 | 6.17 | 6.34 | 6.60 | 7.07 |
| 13.89 | 5.55 | 6.14 | 6.28 | 6.63 | 7.01 |
| 13.90 | 5.53 | 6.24 | 6.27 | 6.64 | 6.96 |
| 13.91 | 5.54 | 6.21 | 6.32 | 6.66 | 6.95 |
| 13.92 | 5.55 | 6.07 | 6.35 | 6.67 | 7.01 |
| 13.93 | 5.56 | 6.09 | 6.37 | 6.61 | 7.06 |
| 13.94 | 5.56 | 6.22 | 6.37 | 6.58 | 7.03 |
| 13.95 | 5.56 | 6.19 | 6.30 | 6.67 | 6.93 |
| 13.96 | 5.54 | 6.07 | 6.32 | 6.74 | 6.97 |
| 13.97 | 5.52 | 6.15 | 6.37 | 6.67 | 7.08 |
| 13.98 | 5.52 | 6.25 | 6.33 | 6.64 | 7.03 |
| 13.99 | 5.54 | 6.19 | 6.29 | 6.72 | 6.88 |
| 14.00 | 5.51 | 6.13 | 6.33 | 6.79 | 6.89 |
| 14.01 | 5.48 | 6.19 | 6.35 | 6.73 | 7.01 |
| 14.02 | 5.51 | 6.18 | 6.34 | 6.65 | 7.02 |
| 14.03 | 5.54 | 6.12 | 6.37 | 6.65 | 6.96 |
| 14.04 | 5.53 | 6.14 | 6.38 | 6.71 | 6.94 |
| 14.05 | 5.52 | 6.15 | 6.36 | 6.72 | 6.97 |
| 14.06 | 5.55 | 6.13 | 6.35 | 6.67 | 7.02 |
| 14.07 | 5.57 | 6.15 | 6.37 | 6.64 | 7.00 |
| 14.08 | 5.56 | 6.16 | 6.35 | 6.70 | 6.91 |
| 14.09 | 5.53 | 6.14 | 6.34 | 6.79 | 6.87 |
| 14.10 | 5.53 | 6.14 | 6.39 | 6.78 | 6.93 |
| 14.11 | 5.54 | 6.15 | 6.40 | 6.71 | 6.98 |
| 14.12 | 5.53 | 6.13 | 6.33 | 6.66 | 6.95 |
| 14.13 | 5.55 | 6.11 | 6.33 | 6.70 | 6.86 |
| 14.14 | 5.53 | 6.15 | 6.42 | 6.78 | 6.88 |
| 14.15 | 5.50 | 6.14 | 6.41 | 6.70 | 7.00 |
| 14.16 | 5.51 | 6.09 | 6.34 | 6.59 | 7.00 |
| 14.17 | 5.54 | 6.12 | 6.34 | 6.69 | 6.87 |
| 14.18 | 5.54 | 6.18 | 6.40 | 6.81 | 6.83 |
| 14.19 | 5.53 | 6.15 | 6.36 | 6.73 | 6.90 |
| 14.20 | 5.53 | 6.05 | 6.31 | 6.66 | 6.96 |
| 14.21 | 5.54 | 6.09 | 6.36 | 6.71 | 6.85 |
| 14.22 | 5.51 | 6.18 | 6.40 | 6.76 | 6.74 |
|  |  |  |  |  |  |
| *t* (s) | Pressure loads (kPa) | | | | |
| *hu* = 0.30 m *hd*= 0.30 m | | | | |
| *h* = 0.10 m | *h* = 0.20 m | *h* = 0.30 m | *h* = 0.40 m | *h* = 0.50 m |
| 14.23 | 5.48 | 6.09 | 6.34 | 6.74 | 6.86 |
| 14.24 | 5.51 | 6.00 | 6.32 | 6.68 | 7.01 |
| 14.25 | 5.56 | 6.11 | 6.40 | 6.66 | 6.92 |
| 14.26 | 5.55 | 6.16 | 6.41 | 6.70 | 6.81 |
| 14.27 | 5.48 | 5.99 | 6.33 | 6.74 | 6.87 |
| 14.28 | 5.46 | 6.00 | 6.32 | 6.73 | 6.92 |
| 14.29 | 5.50 | 6.15 | 6.38 | 6.67 | 6.89 |
| 14.30 | 5.52 | 6.10 | 6.36 | 6.67 | 6.83 |
| 14.31 | 5.49 | 5.98 | 6.33 | 6.75 | 6.80 |
| 14.32 | 5.48 | 6.05 | 6.38 | 6.80 | 6.80 |
| 14.33 | 5.52 | 6.13 | 6.41 | 6.70 | 6.85 |
| 14.34 | 5.54 | 6.02 | 6.38 | 6.63 | 6.88 |
| 14.35 | 5.50 | 5.96 | 6.35 | 6.72 | 6.84 |
| 14.36 | 5.47 | 6.04 | 6.36 | 6.77 | 6.80 |
| 14.37 | 5.53 | 6.06 | 6.39 | 6.68 | 6.80 |
| 14.38 | 5.59 | 5.98 | 6.36 | 6.64 | 6.86 |
| 14.39 | 5.52 | 6.02 | 6.35 | 6.72 | 6.89 |
| 14.40 | 5.46 | 6.06 | 6.37 | 6.75 | 6.83 |
| 14.41 | 5.50 | 6.00 | 6.38 | 6.73 | 6.75 |
| 14.42 | 5.55 | 5.98 | 6.38 | 6.72 | 6.78 |
| 14.43 | 5.52 | 5.99 | 6.40 | 6.71 | 6.87 |
| 14.44 | 5.50 | 5.99 | 6.41 | 6.74 | 6.87 |
| 14.45 | 5.51 | 5.96 | 6.39 | 6.79 | 6.77 |
| 14.46 | 5.51 | 5.95 | 6.38 | 6.76 | 6.80 |
| 14.47 | 5.49 | 5.94 | 6.38 | 6.68 | 6.93 |
| 14.48 | 5.50 | 5.96 | 6.35 | 6.67 | 6.90 |
| 14.49 | 5.52 | 5.96 | 6.35 | 6.75 | 6.75 |
| 14.50 | 5.50 | 5.93 | 6.38 | 6.78 | 6.74 |
| 14.51 | 5.49 | 5.92 | 6.38 | 6.73 | 6.81 |
| 14.52 | 5.49 | 5.95 | 6.37 | 6.71 | 6.82 |
| 14.53 | 5.47 | 5.92 | 6.40 | 6.76 | 6.79 |
| 14.54 | 5.47 | 5.86 | 6.41 | 6.81 | 6.86 |
| 14.55 | 5.51 | 5.88 | 6.37 | 6.82 | 6.94 |
| 14.56 | 5.52 | 5.93 | 6.36 | 6.80 | 6.89 |
| 14.57 | 5.52 | 5.88 | 6.37 | 6.79 | 6.85 |
| 14.58 | 5.51 | 5.87 | 6.37 | 6.79 | 6.87 |
| 14.59 | 5.50 | 5.89 | 6.35 | 6.81 | 6.82 |
| 14.60 | 5.49 | 5.87 | 6.34 | 6.81 | 6.78 |
| 14.61 | 5.50 | 5.88 | 6.38 | 6.81 | 6.89 |
| 14.62 | 5.52 | 5.91 | 6.41 | 6.81 | 6.95 |
|  |  |  |  |  |  |
| *t* (s) | Pressure loads (kPa) | | | | |
| *hu* = 0.30 m *hd*= 0.30 m | | | | |
| *h* = 0.10 m | *h* = 0.20 m | *h* = 0.30 m | *h* = 0.40 m | *h* = 0.50 m |
| 14.63 | 5.51 | 5.86 | 6.38 | 6.87 | 6.84 |
| 14.64 | 5.53 | 5.85 | 6.33 | 6.92 | 6.78 |
| 14.65 | 5.54 | 5.90 | 6.38 | 6.89 | 6.95 |
| 14.66 | 5.54 | 5.83 | 6.43 | 6.86 | 7.08 |
| 14.67 | 5.53 | 5.79 | 6.38 | 6.89 | 6.92 |
| 14.68 | 5.53 | 5.86 | 6.37 | 6.93 | 6.79 |
| 14.69 | 5.51 | 5.92 | 6.41 | 6.92 | 6.93 |
| 14.70 | 5.51 | 5.89 | 6.42 | 6.91 | 7.02 |
| 14.71 | 5.53 | 5.86 | 6.39 | 6.95 | 6.91 |
| 14.72 | 5.54 | 5.89 | 6.39 | 6.95 | 6.84 |
| 14.73 | 5.53 | 5.87 | 6.42 | 6.94 | 6.92 |
| 14.74 | 5.54 | 5.80 | 6.46 | 6.99 | 7.00 |
| 14.75 | 5.56 | 5.80 | 6.46 | 7.03 | 7.04 |
| 14.76 | 5.55 | 5.85 | 6.46 | 6.99 | 7.05 |
| 14.77 | 5.55 | 5.83 | 6.46 | 6.98 | 7.01 |
| 14.78 | 5.57 | 5.83 | 6.47 | 7.05 | 6.96 |
| 14.79 | 5.57 | 5.88 | 6.50 | 7.09 | 7.00 |
| 14.80 | 5.59 | 5.86 | 6.51 | 7.05 | 7.05 |
| 14.81 | 5.61 | 5.84 | 6.49 | 7.02 | 7.04 |
| 14.82 | 5.62 | 5.88 | 6.49 | 7.06 | 6.98 |
| 14.83 | 5.64 | 5.86 | 6.51 | 7.11 | 7.01 |
| 14.84 | 5.67 | 5.83 | 6.56 | 7.09 | 7.10 |
| 14.85 | 5.68 | 5.88 | 6.58 | 7.03 | 7.11 |
| 14.86 | 5.67 | 5.92 | 6.54 | 7.03 | 7.03 |
| 14.87 | 5.65 | 5.90 | 6.53 | 7.12 | 7.03 |
| 14.88 | 5.65 | 5.91 | 6.61 | 7.15 | 7.14 |
| 14.89 | 5.68 | 5.97 | 6.63 | 7.06 | 7.16 |
| 14.90 | 5.71 | 5.99 | 6.55 | 7.03 | 7.09 |
| 14.91 | 5.71 | 5.95 | 6.54 | 7.12 | 7.05 |
| 14.92 | 5.72 | 5.97 | 6.61 | 7.12 | 7.08 |
| 14.93 | 5.75 | 6.01 | 6.63 | 7.02 | 7.10 |
| 14.94 | 5.78 | 6.02 | 6.57 | 7.00 | 7.14 |
| 14.95 | 5.79 | 6.03 | 6.59 | 7.06 | 7.13 |
| 14.96 | 5.79 | 6.03 | 6.65 | 7.09 | 7.09 |
| 14.97 | 5.80 | 6.04 | 6.65 | 7.08 | 7.13 |
| 14.98 | 5.80 | 6.15 | 6.59 | 7.06 | 7.21 |
| 14.99 | 5.82 | 6.20 | 6.60 | 7.04 | 7.19 |
| 15.00 | 5.85 | 6.14 | 6.64 | 7.06 | 7.11 |
